# Supplementary material for: Therapeutic Effect and Mechanism Study of Rhodiola wallichiana var. cholaensis Injection to Acute Blood Stasis Using Metabolomics Based on UPLC-Q/TOF-MS
Source: Hindawi journal article supplement (doi:10.1155/2019/1514845), 2019-11-03
Supplement: f1 [file 1514845.f1.pdf]

## Supplementary Materials

### The Therapeutic Effect and Mechanism Study of *Rhodiola wallichianavar. Cholaensis* Injection to Acute Blood Stasis Using Metabolomics Based on UPLC-Q/TOF-MS

Nan Ran,<sup>1</sup> Zhiqiang Pang,<sup>1</sup> Xuewa Guan,<sup>1</sup> Guoqiang Wang,<sup>1</sup> Jinping Liu,<sup>2</sup> Pingya Li,<sup>2</sup> Jingtong Zheng,<sup>1</sup> and Fang Wang<sup>1</sup>

1 Department of Pathogen Biology, College of Basic Medical Sciences, Jilin University, Changchun 130021, China.

2 Research Center of Natural Drug, School of Pharmaceutical Sciences, Jilin University, Changchun 130021, China.

Correspondence should be addressed to Fang Wang; wf@jlu.edu.cn

Table S1: Validation of systematic stability and repeatability of UPLC-MS/MS (plasma samples).

| Modes | NO   | RT/<br>min | m/z       | m/z in Spectrum         |                     | RT of Chromatogram      |                     |
|-------|------|------------|-----------|-------------------------|---------------------|-------------------------|---------------------|
|       |      |            |           | Repeatability<br>(RSD%) | Precision<br>(RSD%) | Repeatability<br>(RSD%) | Precision<br>(RSD%) |
| ESI+  | P-1  | 25.01      | 284.2935  | 0.0025                  | 0.0031              | 0.0010                  | 0.0013              |
|       | P-2  | 27.44      | 338.3405  | 0.0026                  | 0.0054              | 0.0016                  | 0.0021              |
|       | P-3  | 27.14      | 413.2658  | 0.0029                  | 0.0041              | 0.0014                  | 0.0037              |
|       | P-4  | 17.99      | 496.3424  | 0.0024                  | 0.0047              | 0.0000                  | 0.0010              |
|       | P-5  | 20.62      | 524.3738  | 0.0019                  | 0.0052              | 0.0003                  | 0.0007              |
|       | P-6  | 27.12      | 614.3820  | 0.0072                  | 0.0016              | 1.5469                  | 0.3746              |
|       | P-7  | 27.62      | 786.6028  | 0.0095                  | 0.0009              | 0.0012                  | 0.5438              |
|       | P-8  | 27.14      | 830.5452  | 0.0013                  | 0.0028              | 1.3148                  | 0.4056              |
|       | P-9  | 17.99      | 991.6757  | 0.0019                  | 0.0007              | 0.3564                  | 0.4783              |
|       | P-10 | 20.60      | 1047.7395 | 0.0034                  | 0.0079              | 0.5601                  | 0.0013              |
| ESI-  | P-1  | 0.61       | 215.0349  | 0.0054                  | 0.0033              | 0.0021                  | 0.0020              |
|       | P-2  | 24.83      | 355.2599  | 0.0051                  | 0.0032              | 0.0019                  | 0.0052              |
|       | P-3  | 18.03      | 480.3106  | 0.0054                  | 0.0025              | 0.0020                  | 0.0021              |
|       | P-4  | 18.02      | 540.3315  | 0.0042                  | 0.0040              | 0.0019                  | 0.6609              |
|       | P-5  | 20.69      | 640.2898  | 0.0039                  | 0.0021              | 0.9837                  | 0.1702              |
|       | P-6  | 0.53       | 792.8534  | 0.0056                  | 0.0031              | 0.4623                  | 0.0034              |
|       | P-7  | 0.53       | 860.8389  | 0.0050                  | 0.0045              | 0.6138                  | 0.0089              |

|      |       |           |        |        |        |        |
|------|-------|-----------|--------|--------|--------|--------|
| P-8  | 0.53  | 928.8245  | 0.0059 | 0.0023 | 1.2341 | 0.1918 |
| P-9  | 17.02 | 1083.6509 | 0.0059 | 0.0035 | 0.1985 | 0.0495 |
| P-10 | 17.04 | 1131.6497 | 0.0047 | 0.0030 | 0.8927 | 0.2078 |

m/z, mass to charge ratio, Th; RT, retention time, min, PA, peak area. Precision is intermediate precision, RSD, Relative standard deviation.

Table S2: Validation of systematic stability and repeatability of UPLC-MS/MS (urine samples).

| Modes | NO   | RT/<br>min | m/z       | m/z in Spectrum         |                     | RT of Chromatogram      |                     |
|-------|------|------------|-----------|-------------------------|---------------------|-------------------------|---------------------|
|       |      |            |           | Repeatability<br>(RSD%) | Precision<br>(RSD%) | Repeatability<br>(RSD%) | Precision<br>(RSD%) |
| ESI+  | U-1  | 22.79      | 282.2778  | 0.0008                  | 0.0034              | 1.3827                  | 2.3819              |
|       | U-2  | 27.43      | 338.3406  | 0.0013                  | 0.0053              | 3.2382                  | 0.1414              |
|       | U-3  | 27.15      | 413.2659  | 0.0038                  | 0.0055              | 2.4864                  | 1.4159              |
|       | U-4  | 26.14      | 540.5339  | 0.0024                  | 0.0013              | 0.9178                  | 2.5259              |
|       | U-5  | 28.05      | 663.4549  | 0.0000                  | 0.0073              | 1.2749                  | 0.0084              |
|       | U-6  | 25.83      | 758.5719  | 0.0019                  | 0.0062              | 2.0198                  | 0.9476              |
|       | U-7  | 25.80      | 834.6038  | 0.0003                  | 0.0005              | 0.8134                  | 1.5849              |
|       | U-8  | 27.78      | 992.7438  | 0.0046                  | 0.0025              | 0.1487                  | 2.0185              |
|       | U-9  | 27.77      | 1075.7151 | 0.0027                  | 0.0164              | 0.9847                  | 0.8915              |
|       | U-10 | 27.23      | 1194.8242 | 0.0015                  | 0.0528              | 1.0941                  | 1.3580              |
| ESI-  | U-1  | 6.43       | 201.0249  | 0.0024                  | 0.0004              | 0.0245                  | 0.2429              |
|       | U-2  | 6.31       | 297.1016  | 0.0048                  | 0.0028              | 0.2594                  | 0.1531              |
|       | U-3  | 8.10       | 357.1038  | 0.0014                  | 0.0025              | 0.9147                  | 0.2563              |
|       | U-4  | 5.00       | 461.1867  | 0.1141                  | 0.0059              | 1.2314                  | 1.0313              |
|       | U-5  | 4.32       | 567.1711  | 0.0057                  | 0.0024              | 0.8357                  | 0.9719              |
|       | U-6  | 8.81       | 659.3276  | 0.0012                  | 0.0052              | 0.1479                  | 0.1972              |
|       | U-7  | 6.26       | 715.2203  | 0.0013                  | 0.0002              | 0.1928                  | 0.9816              |
|       | U-8  | 24.79      | 802.5512  | 0.0008                  | 0.0015              | 1.4862                  | 0.8215              |
|       | U-9  | 28.99      | 885.5432  | 0.0014                  | 0.0154              | 0.5839                  | 0.0015              |
|       | U-10 | 12.27      | 987.5047  | 0.0094                  | 0.0015              | 1.4004                  | 0.0948              |

m/z, mass to charge ratio, Th; RT, retention time, min, PA, peak area. Precision is intermediate precision, RSD, Relative standard deviation.

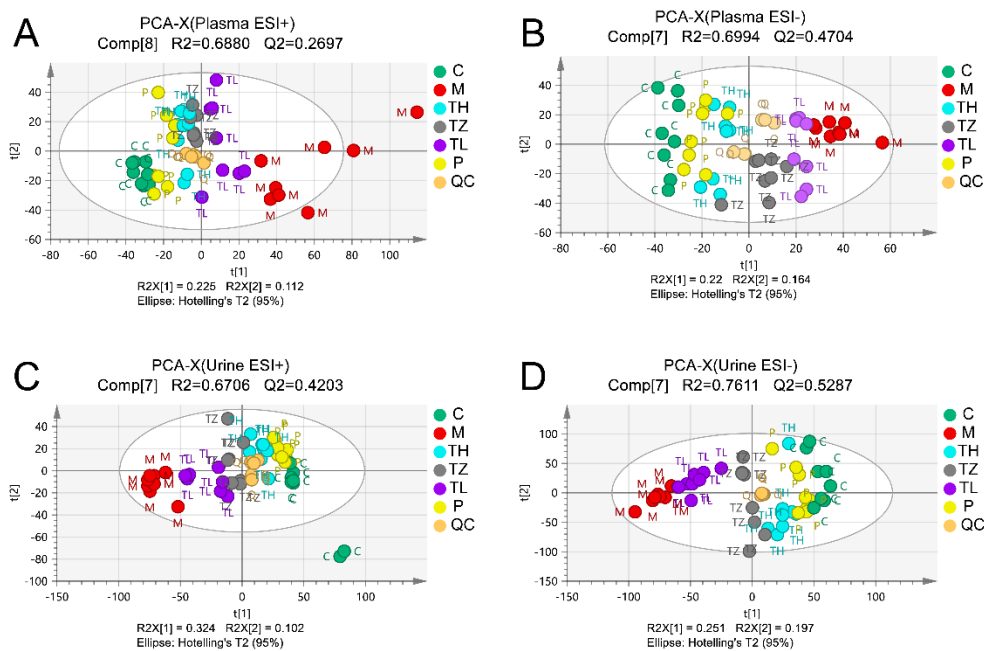

Figure S1: PCA analysis results based on metabolomic data using UPLC -Q/TOF-MS. All plasma samples in ESI<sup>+</sup> modes (A) and in ESI<sup>-</sup> modes (B). All urine samples in ESI<sup>+</sup> modes (C) and in ESI<sup>-</sup> modes (D).

Table S3: Quality parameters (R2X, R2Y, Q2) from cross-validation of OPLS-DA model.

| OPLS-DA Models                   | R2X   | R2Y   | Q2    | sample |
|----------------------------------|-------|-------|-------|--------|
| C vs. T in ESI <sup>+</sup> mode | 0.541 | 0.997 | 0.824 | plasma |
| M vs. C in ESI <sup>+</sup> mode | 0.601 | 0.995 | 0.859 |        |
| M vs. T in ESI <sup>+</sup> mode | 0.587 | 0.995 | 0.810 |        |
| C vs. T in ESI <sup>-</sup> mode | 0.647 | 0.993 | 0.900 |        |
| M vs. C in ESI <sup>-</sup> mode | 0.731 | 0.996 | 0.931 |        |
| M vs. T in ESI <sup>-</sup> mode | 0.401 | 0.684 | 0.392 |        |
| C vs. T in ESI <sup>+</sup> mode | 0.472 | 0.986 | 0.916 | urine  |
| M vs. C in ESI <sup>+</sup> mode | 0.774 | 0.998 | 0.929 |        |
| M vs. T in ESI <sup>+</sup> mode | 0.554 | 0.995 | 0.733 |        |
| C vs. T in ESI <sup>-</sup> mode | 0.669 | 0.989 | 0.957 |        |
| M vs. C in ESI <sup>-</sup> mode | 0.781 | 0.992 | 0.965 |        |
| M vs. T in ESI <sup>-</sup> mode | 0.699 | 0.988 | 0.678 |        |

Table S4: The pairwise-comparison *P*-values of the post-hoc analysis for multiple comparisons in rats.

| No. | C vs. M | M vs. TH | M vs. TM | M vs. TL | C vs. TH | M vs. P |
|-----|---------|----------|----------|----------|----------|---------|
| P1  | 0.0005  | 0.0058   | 0.0039   | 0.0149   | 0.8195   | 0.0099  |
| P2  | 0.0089  | 0.0039   | 0.0328   | 0.0001   | 0.2874   | 0.0040  |
| P3  | 0.0046  | 0.0071   | 0.0219   | 0.0148   | 0.2924   | 0.0096  |
| P4  | 0.0091  | 0.0033   | 0.0203   | 0.0417   | 0.4628   | 0.0085  |
| P5  | 0.0032  | 0.0015   | 0.0029   | 0.0009   | 0.5278   | 0.0035  |

|     |        |        |        |        |        |        |
|-----|--------|--------|--------|--------|--------|--------|
| P6  | 0.0003 | 0.0009 | 0.0213 | 0.0028 | 0.7821 | 0.0035 |
| P7  | 0.0061 | 0.0037 | 0.0487 | 0.0009 | 0.0819 | 0.0063 |
| P8  | 0.0007 | 0.0081 | 0.0399 | 0.0149 | 0.2869 | 0.0026 |
| P9  | 0.0007 | 0.0040 | 0.0424 | 0.0099 | 0.0991 | 0.0002 |
| P10 | 0.0087 | 0.0014 | 0.0019 | 0.0209 | 0.1490 | 0.0006 |
| P11 | 0.0009 | 0.0018 | 0.0371 | 0.0091 | 0.3003 | 0.0060 |
| P12 | 0.0027 | 0.0004 | 0.0389 | 0.0049 | 0.0802 | 0.0015 |
| P13 | 0.0003 | 0.0019 | 0.0003 | 0.0248 | 0.0932 | 0.0062 |
| P14 | 0.0067 | 0.0014 | 0.0359 | 0.0249 | 0.2949 | 0.0069 |
| U1  | 0.0048 | 0.0004 | 0.0289 | 0.0147 | 0.1097 | 0.0016 |
| U2  | 0.0008 | 0.0014 | 0.0179 | 0.0049 | 0.4901 | 0.0044 |
| U3  | 0.0068 | 0.0068 | 0.0003 | 0.0032 | 0.5987 | 0.0010 |
| U4  | 0.0018 | 0.0037 | 0.0035 | 0.0007 | 0.4272 | 0.0019 |
| U5  | 0.0059 | 0.0057 | 0.0195 | 0.0184 | 0.4329 | 0.0063 |
| U6  | 0.0064 | 0.0094 | 0.0150 | 0.0147 | 0.3841 | 0.0063 |
| U7  | 0.0081 | 0.0026 | 0.0150 | 0.0429 | 0.3916 | 0.0093 |
| U8  | 0.0019 | 0.0024 | 0.0336 | 0.0310 | 0.3386 | 0.0063 |
| U9  | 0.0015 | 0.0048 | 0.0183 | 0.0049 | 0.2558 | 0.0090 |
| U10 | 0.0037 | 0.0002 | 0.0004 | 0.0001 | 0.3424 | 0.0026 |
| U11 | 0.0027 | 0.0093 | 0.0098 | 0.0040 | 0.6915 | 0.0006 |
| U12 | 0.0041 | 0.0002 | 0.0209 | 0.0140 | 0.1964 | 0.0001 |
| U13 | 0.0063 | 0.0049 | 0.0183 | 0.0091 | 0.0919 | 0.0046 |
| U14 | 0.0052 | 0.0038 | 0.0009 | 0.0004 | 0.1974 | 0.0029 |
| U15 | 0.0063 | 0.0040 | 0.0020 | 0.0319 | 0.5296 | 0.0082 |
| U16 | 0.0009 | 0.0092 | 0.0108 | 0.0294 | 0.2781 | 0.0046 |
| U17 | 0.0062 | 0.0004 | 0.0393 | 0.0067 | 0.0991 | 0.0026 |
| U18 | 0.0005 | 0.0048 | 0.0381 | 0.0037 | 0.0819 | 0.0026 |
| U19 | 0.0062 | 0.0090 | 0.0009 | 0.0139 | 0.1975 | 0.0068 |
| U20 | 0.0093 | 0.0003 | 0.0098 | 0.0421 | 0.7815 | 0.0026 |
| U21 | 0.0024 | 0.0047 | 0.0098 | 0.0098 | 0.1498 | 0.0073 |
| U22 | 0.0004 | 0.0048 | 0.0297 | 0.0018 | 0.2845 | 0.0070 |
| U23 | 0.0073 | 0.0060 | 0.0193 | 0.0407 | 0.0614 | 0.0039 |
| U24 | 0.0085 | 0.0084 | 0.0038 | 0.0298 | 0.1040 | 0.0031 |
| U25 | 0.0073 | 0.0093 | 0.0001 | 0.0480 | 0.0701 | 0.0073 |
| U26 | 0.0065 | 0.0027 | 0.0029 | 0.0367 | 0.1958 | 0.0026 |
| U27 | 0.0070 | 0.0027 | 0.0208 | 0.0058 | 0.5901 | 0.0061 |
| U28 | 0.0058 | 0.0003 | 0.0298 | 0.0004 | 0.2904 | 0.0038 |
| U29 | 0.0063 | 0.0049 | 0.0004 | 0.0046 | 0.6714 | 0.0005 |
| U30 | 0.0004 | 0.0094 | 0.0040 | 0.0498 | 0.0881 | 0.0010 |
| U31 | 0.0073 | 0.0024 | 0.0248 | 0.0249 | 0.1789 | 0.0063 |
| U32 | 0.0045 | 0.0049 | 0.0003 | 0.0050 | 0.4195 | 0.0054 |
| U33 | 0.0006 | 0.0004 | 0.0492 | 0.0184 | 0.3904 | 0.0006 |

Table S5: The relative information of perturbed metabolic pathways in plasma and urine samples.

| Pathway name                            | Match Status | <i>P</i>   | $-\log(P)$ | FDR       | Impact  |
|-----------------------------------------|--------------|------------|------------|-----------|---------|
| Steroid hormone biosynthesis            | 21/70        | 3.0297E-19 | 42.641     | 2.454E-17 | 0.41534 |
| Linoleic acid metabolism                | 3/5          | 1.7723E-4  | 8.6381     | 0.0071776 | 1.0     |
| Arachidonic acid metabolism             | 6/36         | 2.8367E-4  | 8.1677     | 0.0076591 | 0.42491 |
| Retinol metabolism                      | 4/17         | 8.4926E-4  | 7.0711     | 0.017198  | 0.37113 |
| Alpha-linolenic acid metabolism         | 3/9          | 0.0013803  | 6.5854     | 0.022361  | 1.0     |
| Glycerophospholipid metabolism          | 1/30         | 0.56531    | 0.57039    | 1.0       | 0.13889 |
| Tryptophan metabolism                   | 2/41         | 0.30608    | 1.1839     | 1.0       | 0.09149 |
| Biosynthesis of unsaturated fatty acids | 3/42         | 0.10212    | 2.2816     | 1.0       | 0.0     |
| Steroid biosynthesis                    | 1/35         | 0.62234    | 0.47427    | 1.0       | 0.0083  |

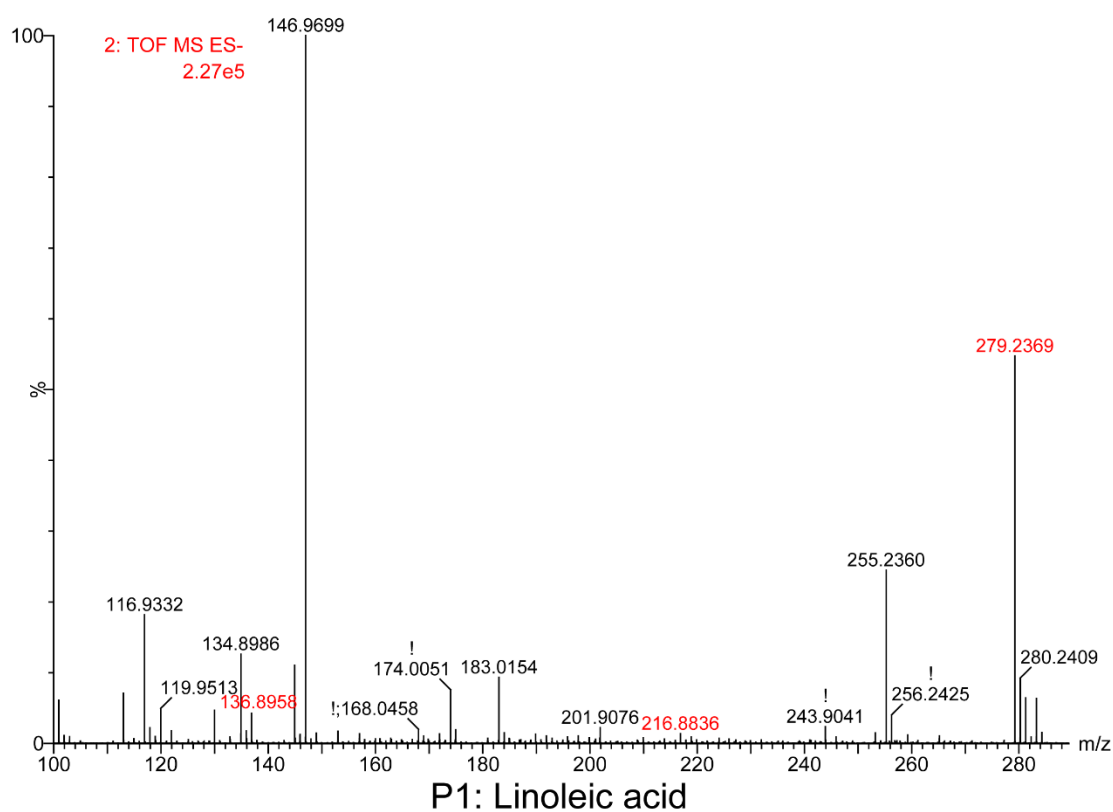

Figure S2: MS/MS spectra of the identified potential marker Linoleic acid in plasma samples.

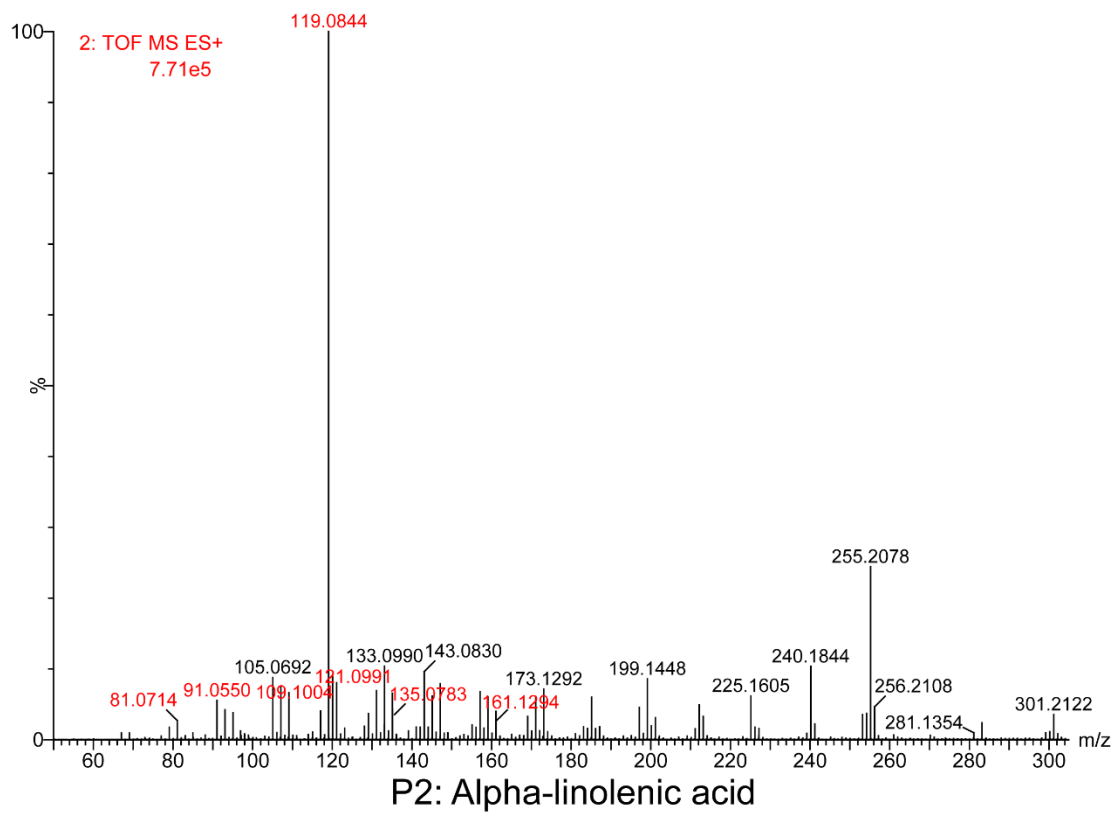

Figure S3: MS/MS spectra of the identified potential marker Alpha-linolenic acid in plasma samples.

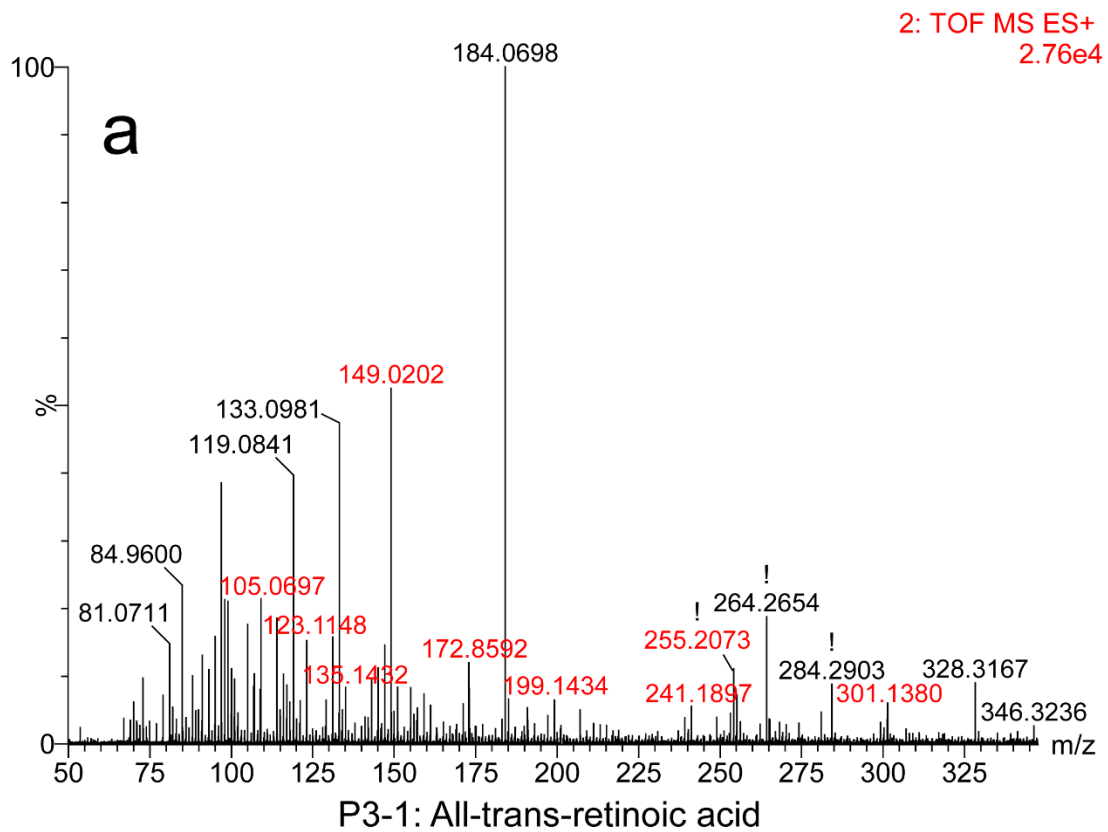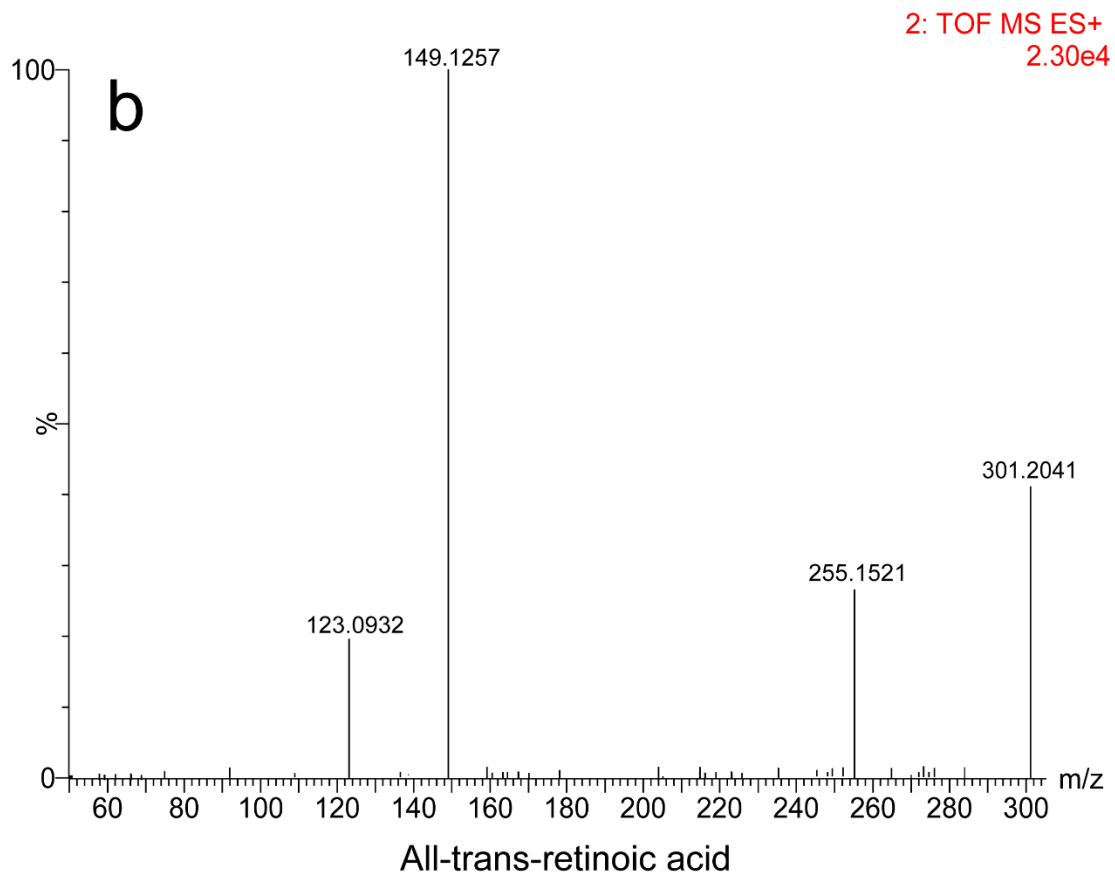

Figure S4: (a) MS/MS spectra of the identified potential marker All-trans-retinoic acid in plasma samples. (b) The reference standard chemical spectra of All-trans-retinoic acid in experimental condition.

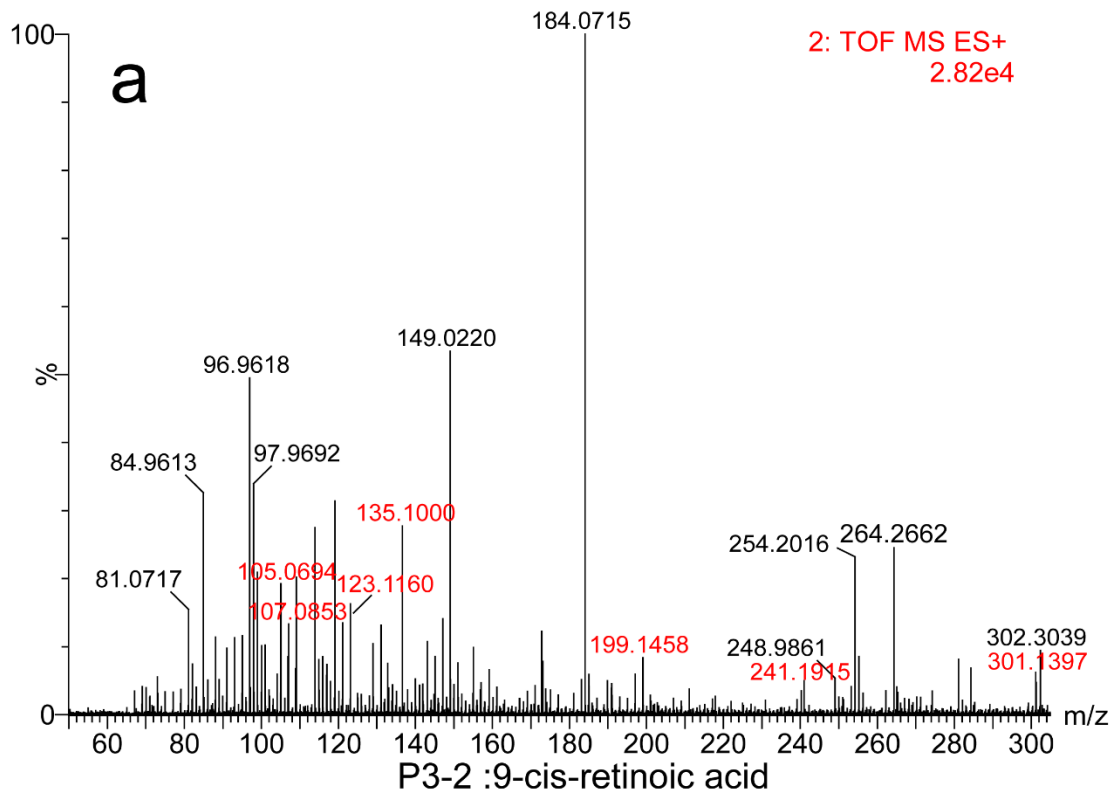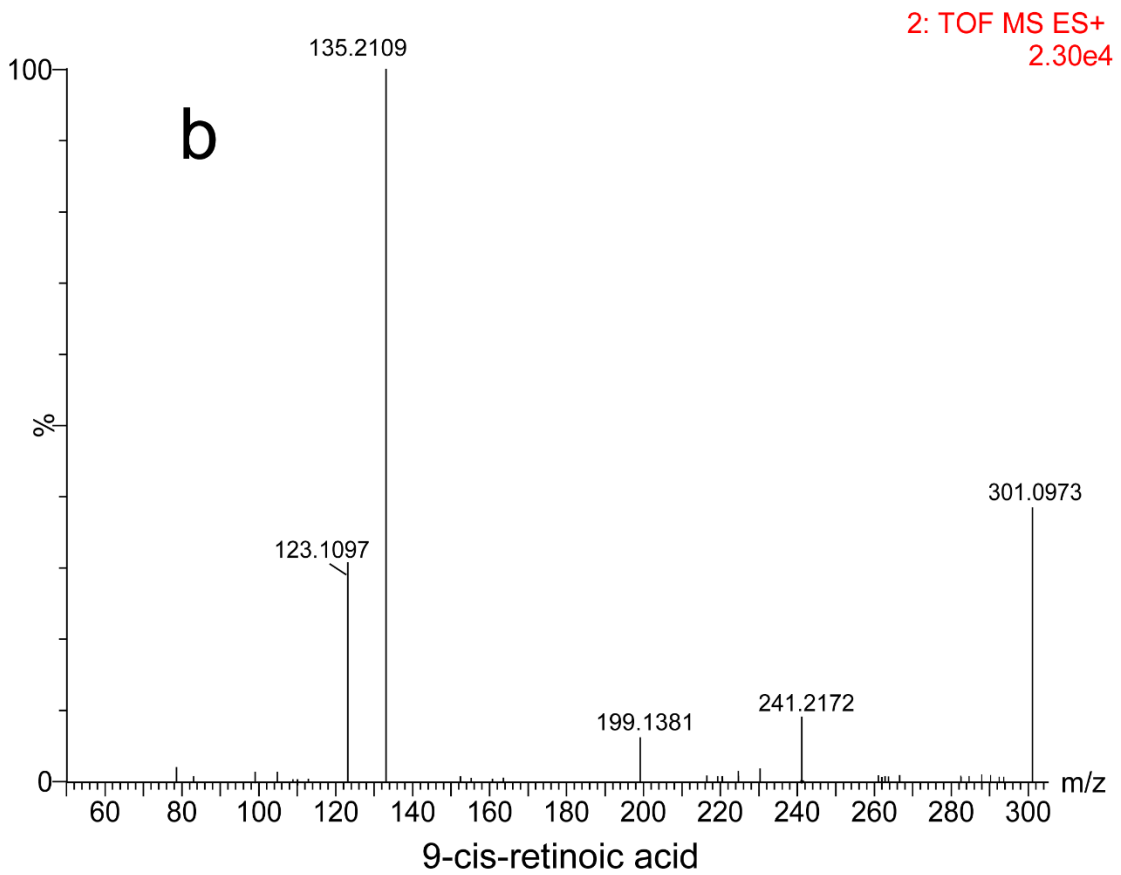

Figure S5: (a) MS/MS spectra of the identified potential marker 9-cis-retinoic acid in plasma samples. (b) The reference standard chemical spectra of 9-cis-retinoic acid in experimental condition.



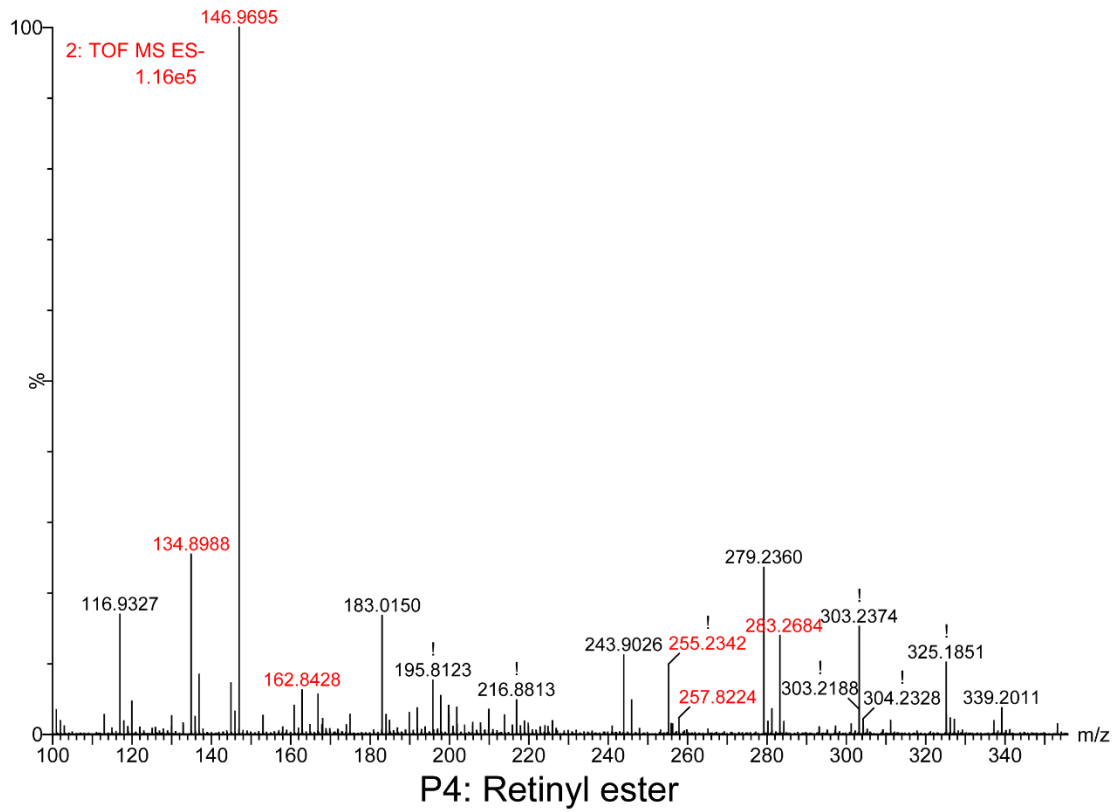

Figure S6: MS/MS spectra of the identified potential marker Retinyl ester in plasma samples.

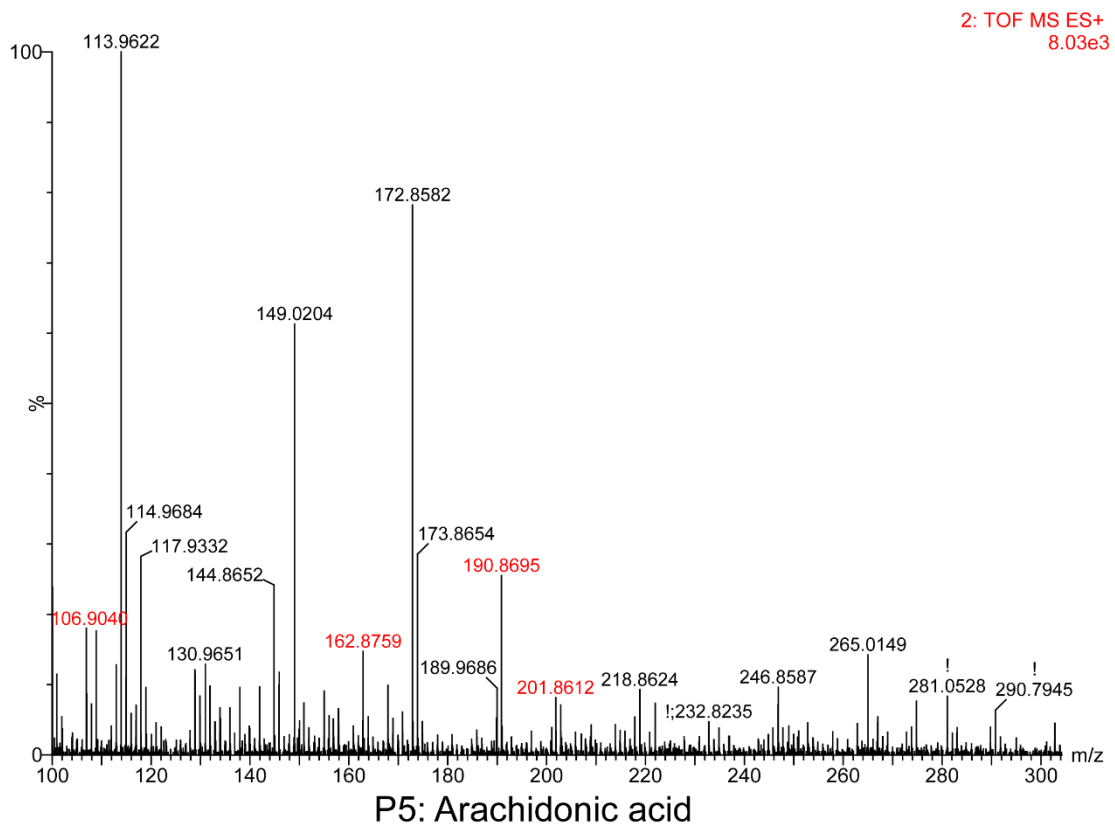

Figure S7: MS/MS spectra of the identified potential marker Arachidonic acid in plasma samples.

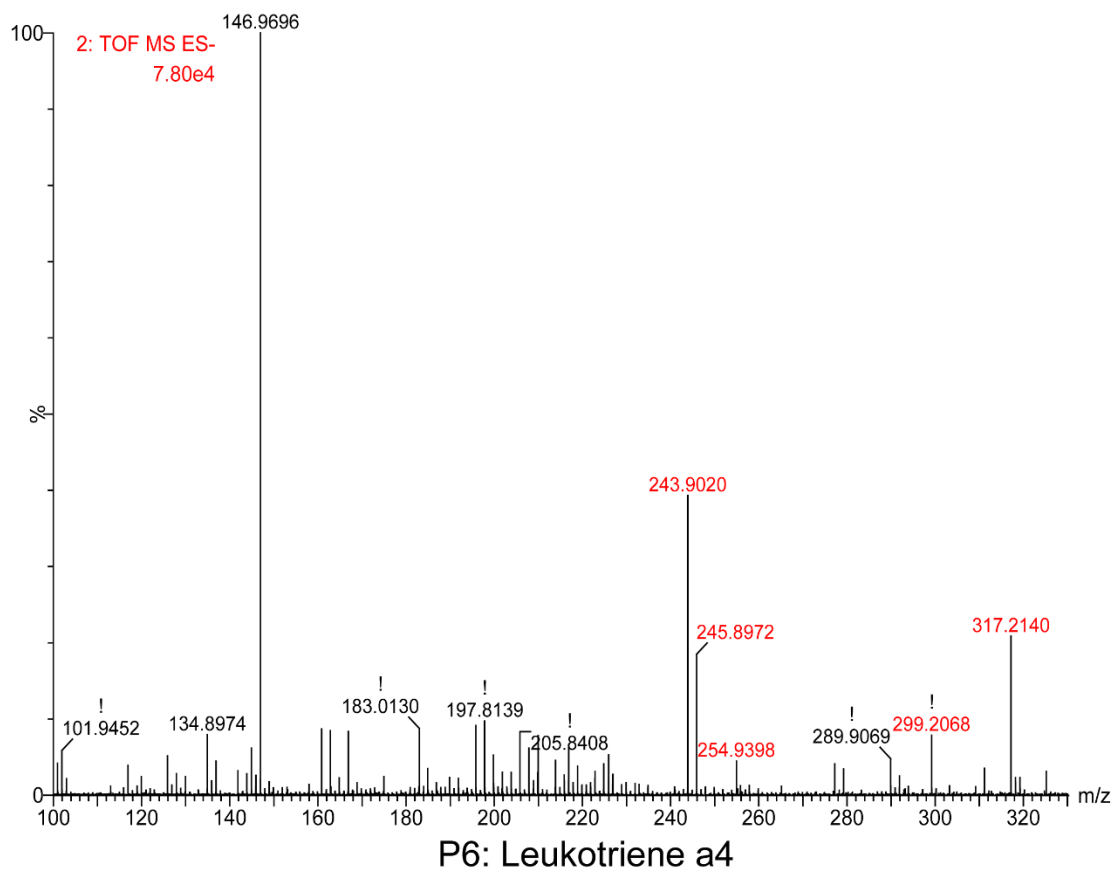

Figure S8: MS/MS spectra of the identified potential marker Leukotriene a4 in plasma samples.

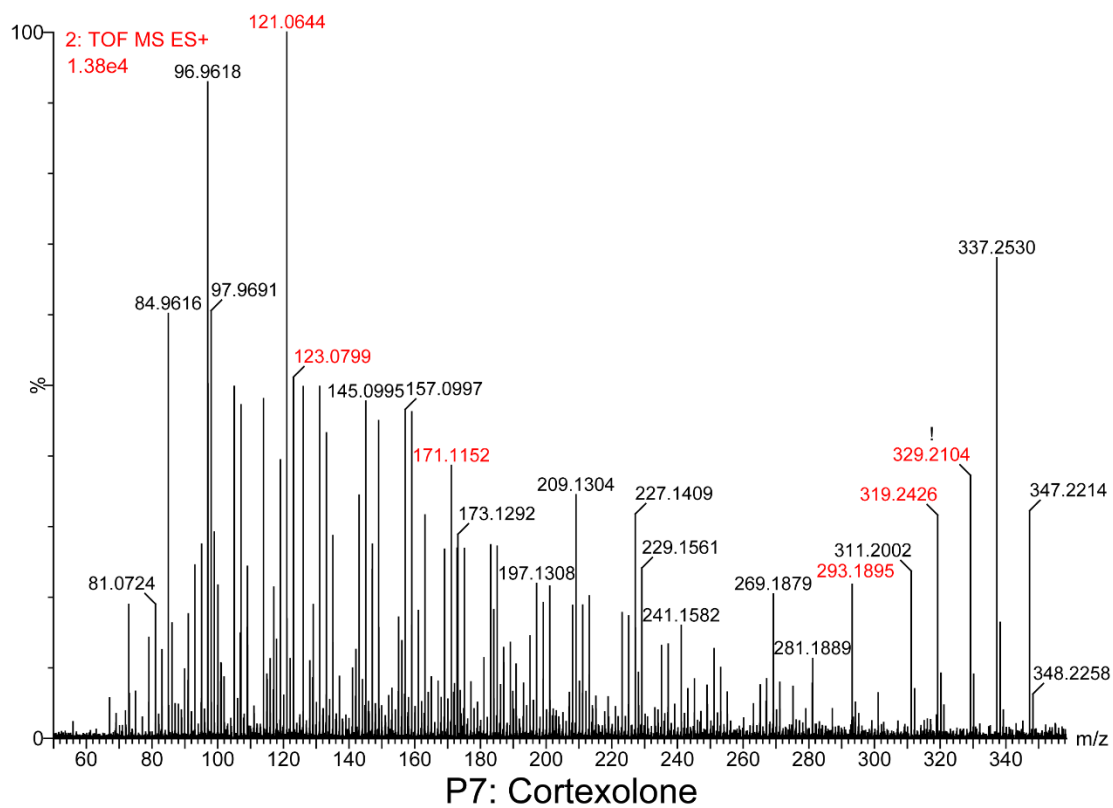

Figure S9: MS/MS spectra of the identified potential marker Cortisolone in plasma samples.

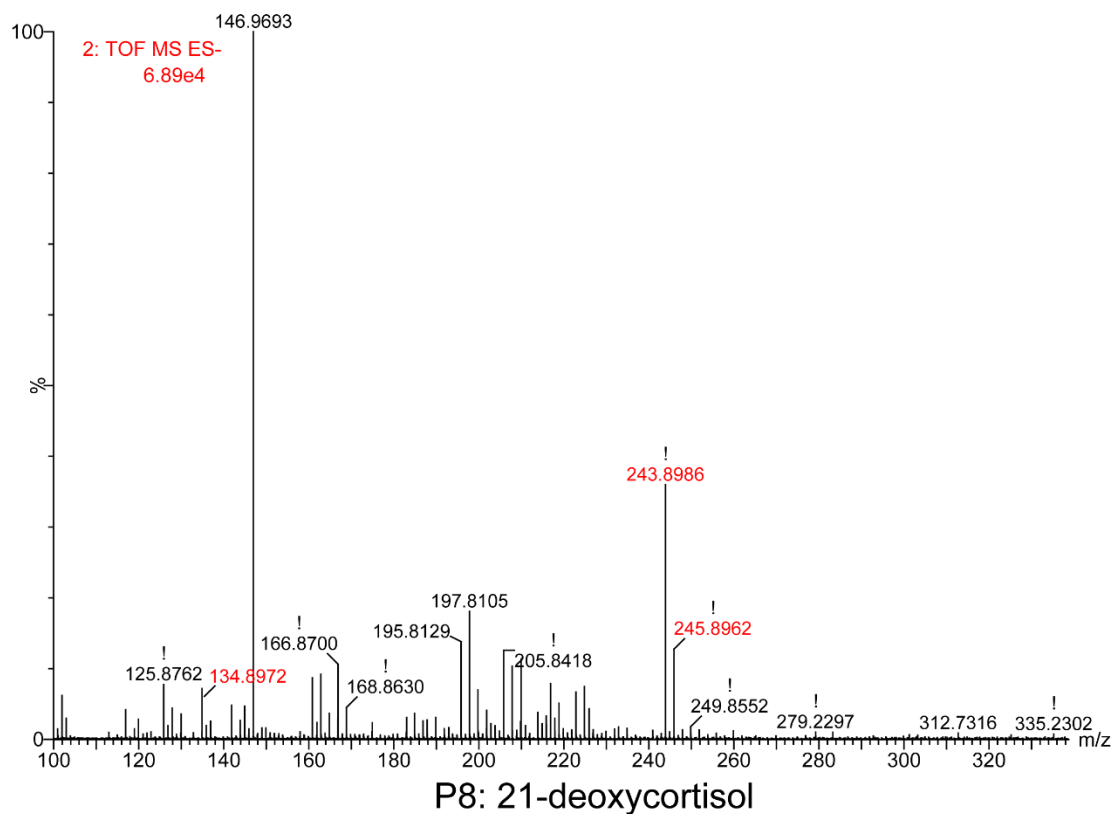

Figure S10: MS/MS spectra of the identified potential marker 21-deoxycortisol in plasma samples.

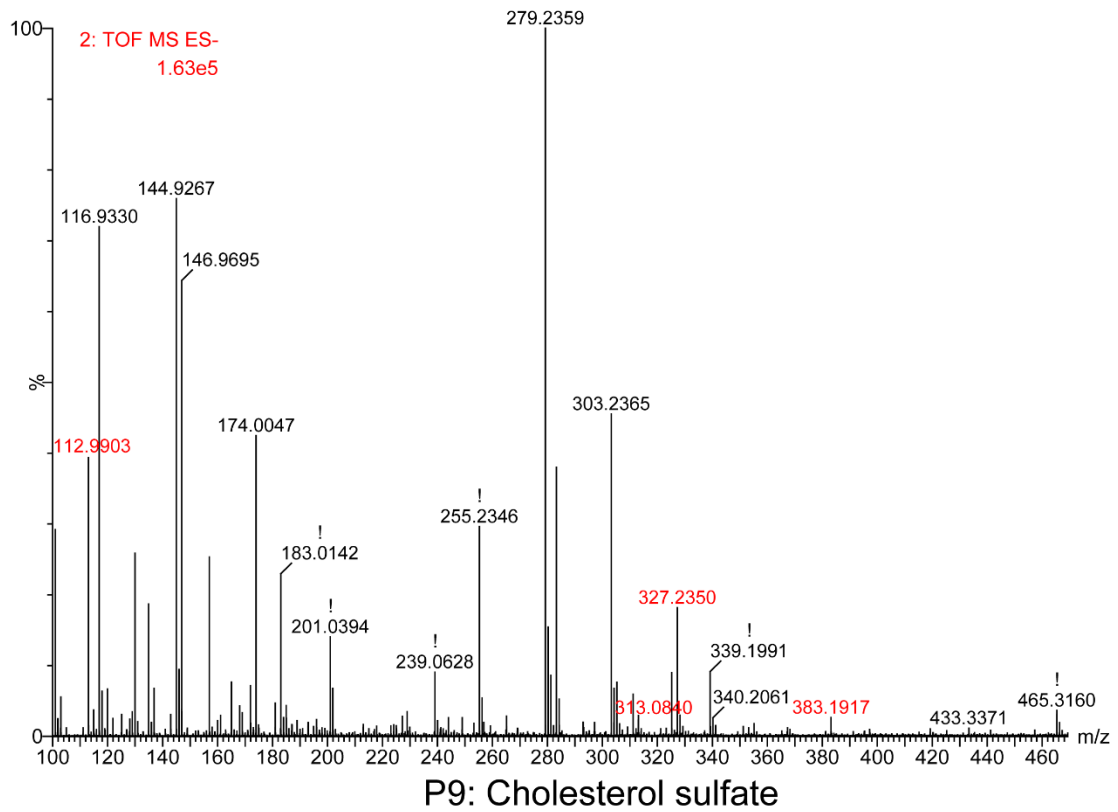

Figure S11: MS/MS spectra of the identified potential marker Cholesterol sulfate in plasma samples.

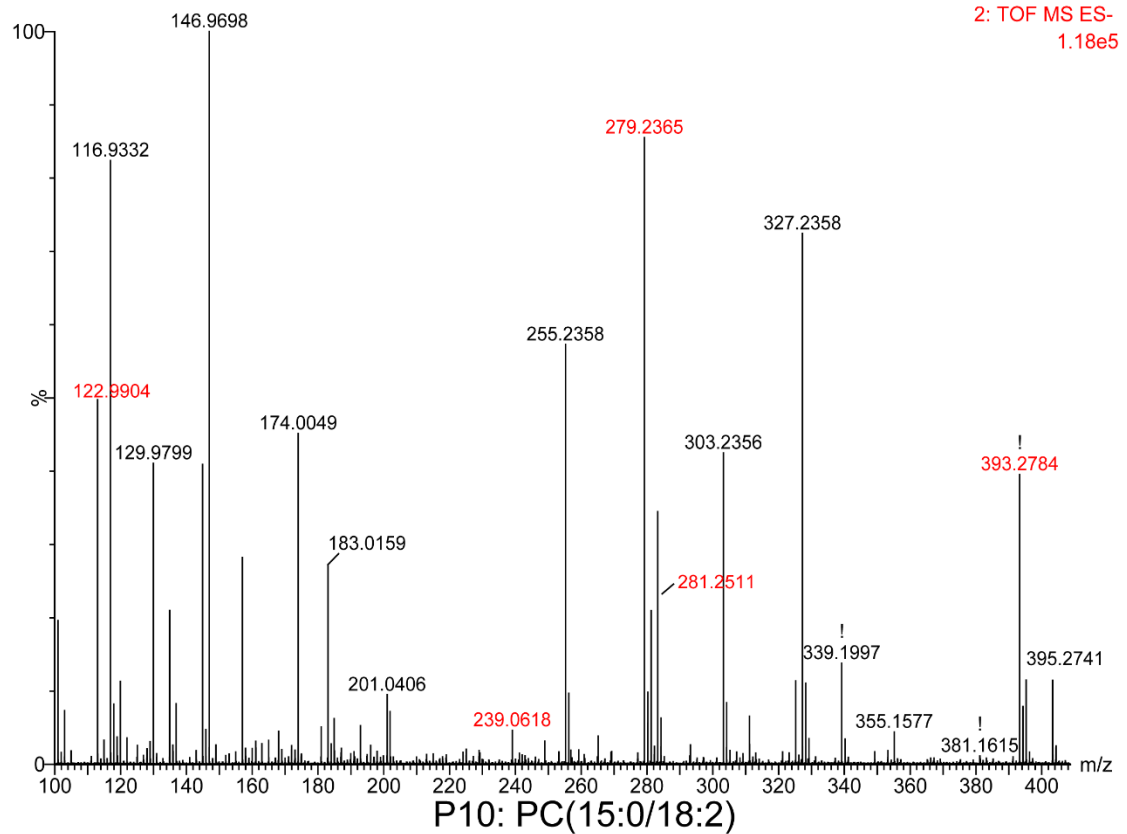

Figure S12: MS/MS spectra of the identified potential marker PC (15:0/18:2) in plasma samples.

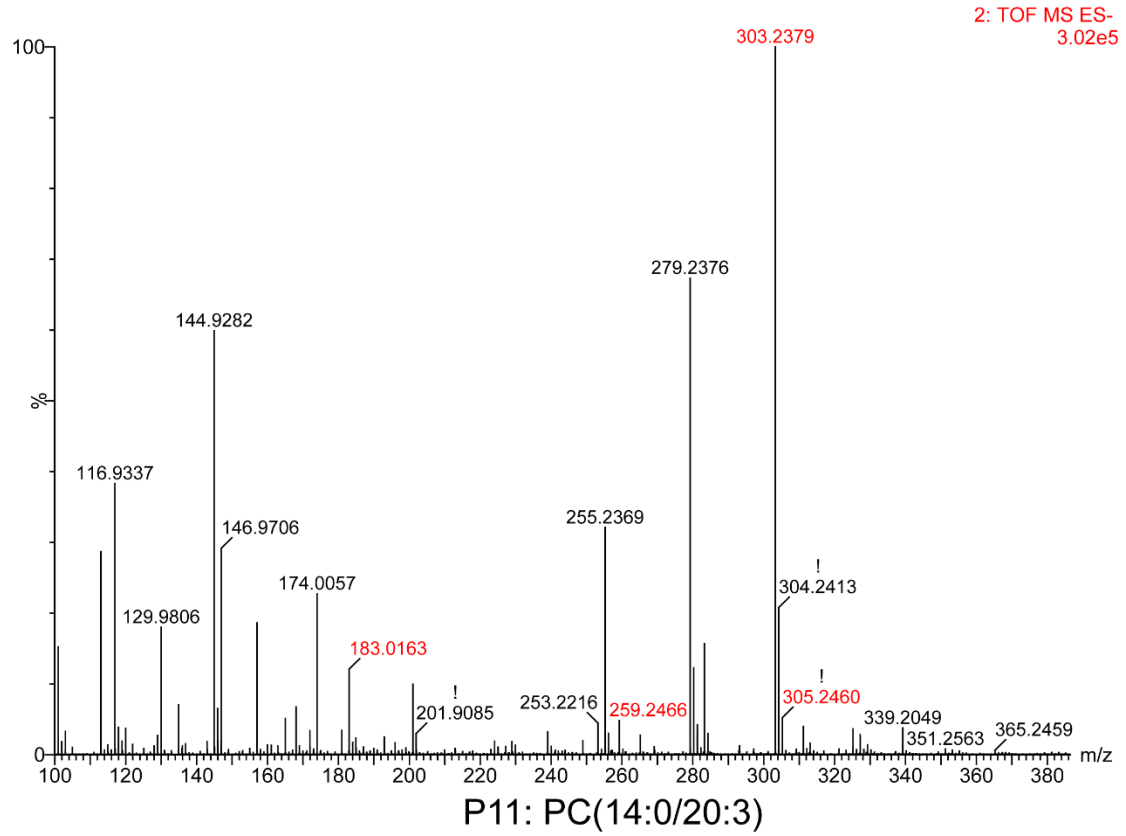

Figure S13: MS/MS spectra of the identified potential marker PC (14:0/20:3) in plasma samples.

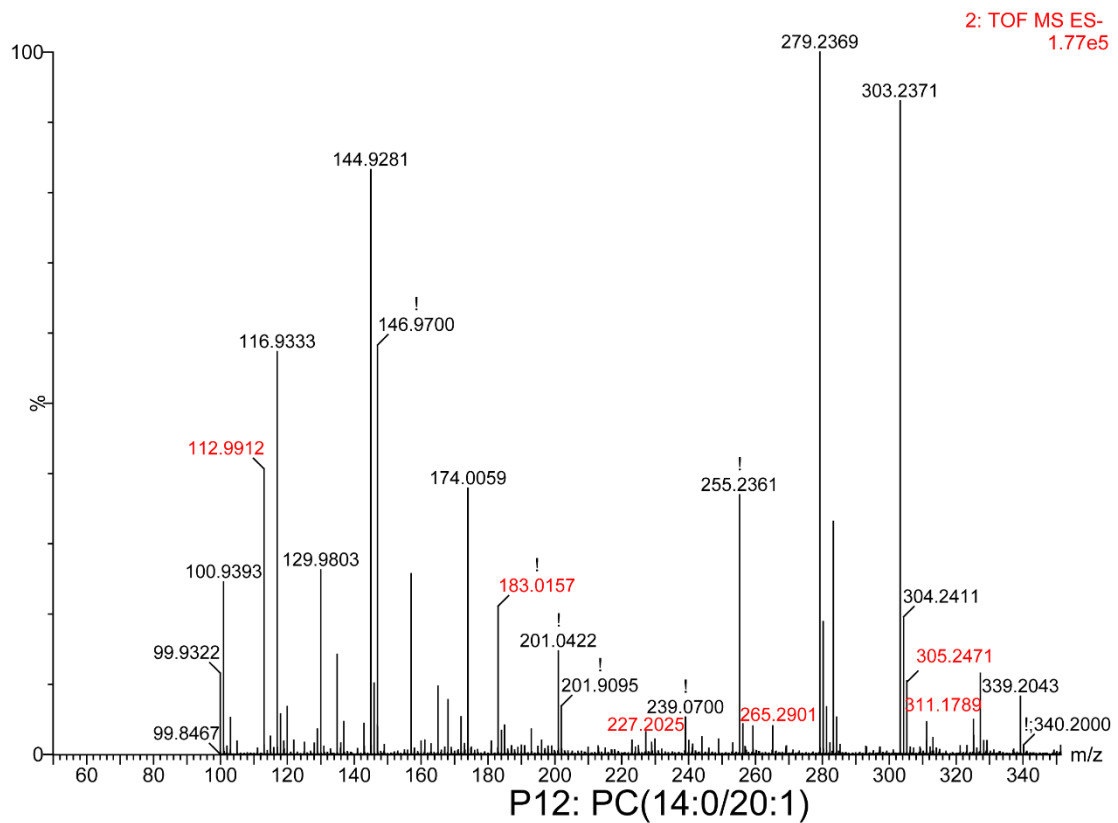

Figure S14: MS/MS spectra of the identified potential marker PC (14:0/20:1) in plasma samples.

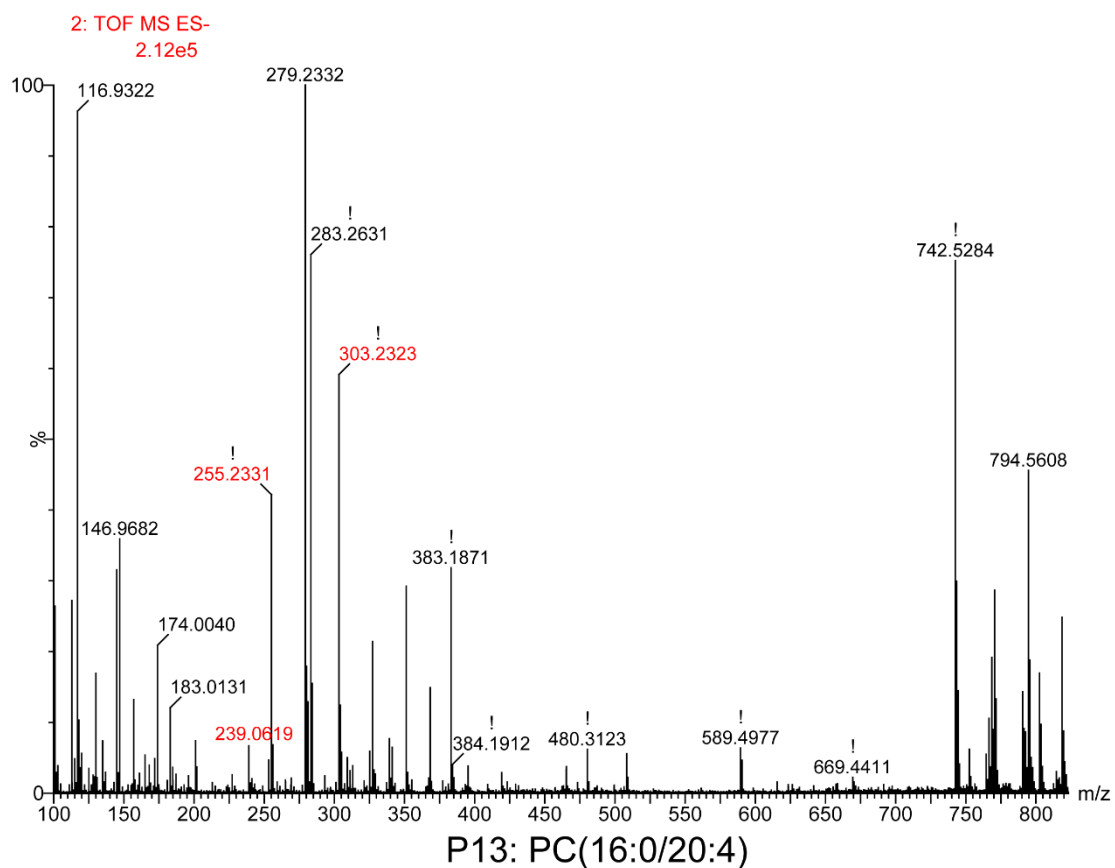

Figure S15: MS/MS spectra of the identified potential marker PC (16:0/20:4) in plasma samples.

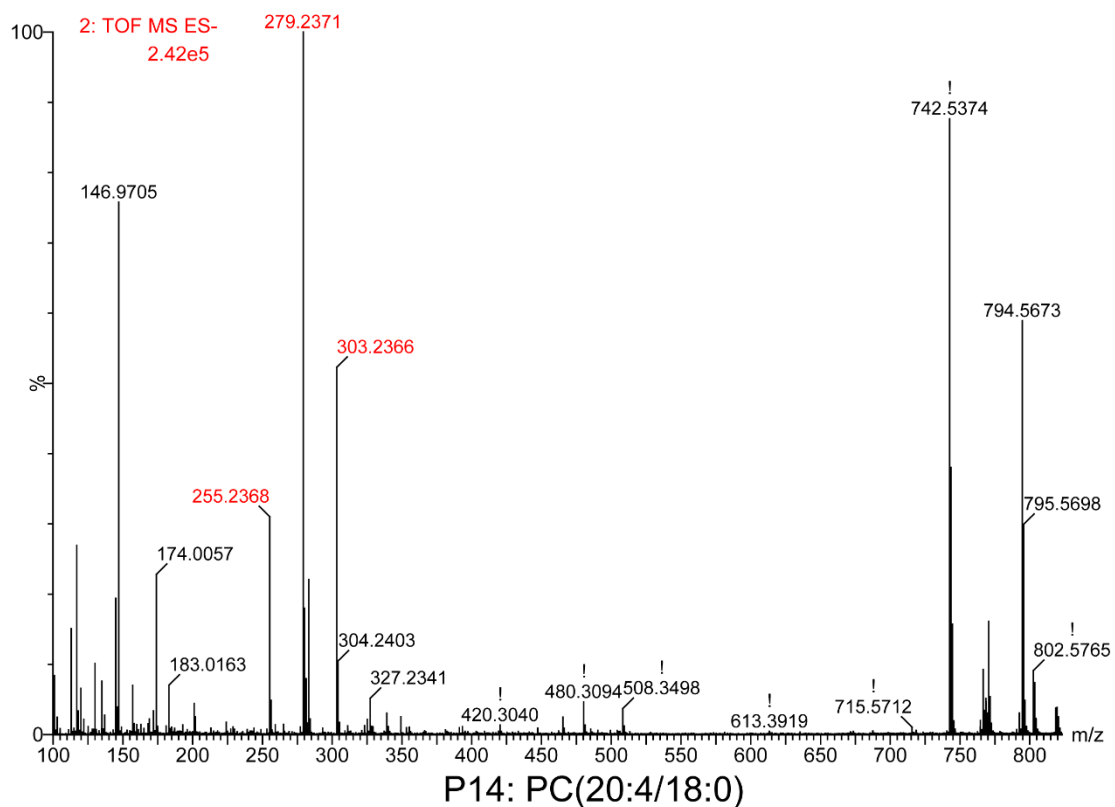

Figure S16: MS/MS spectra of the identified potential marker PC (20:4/18:0) in plasma samples.

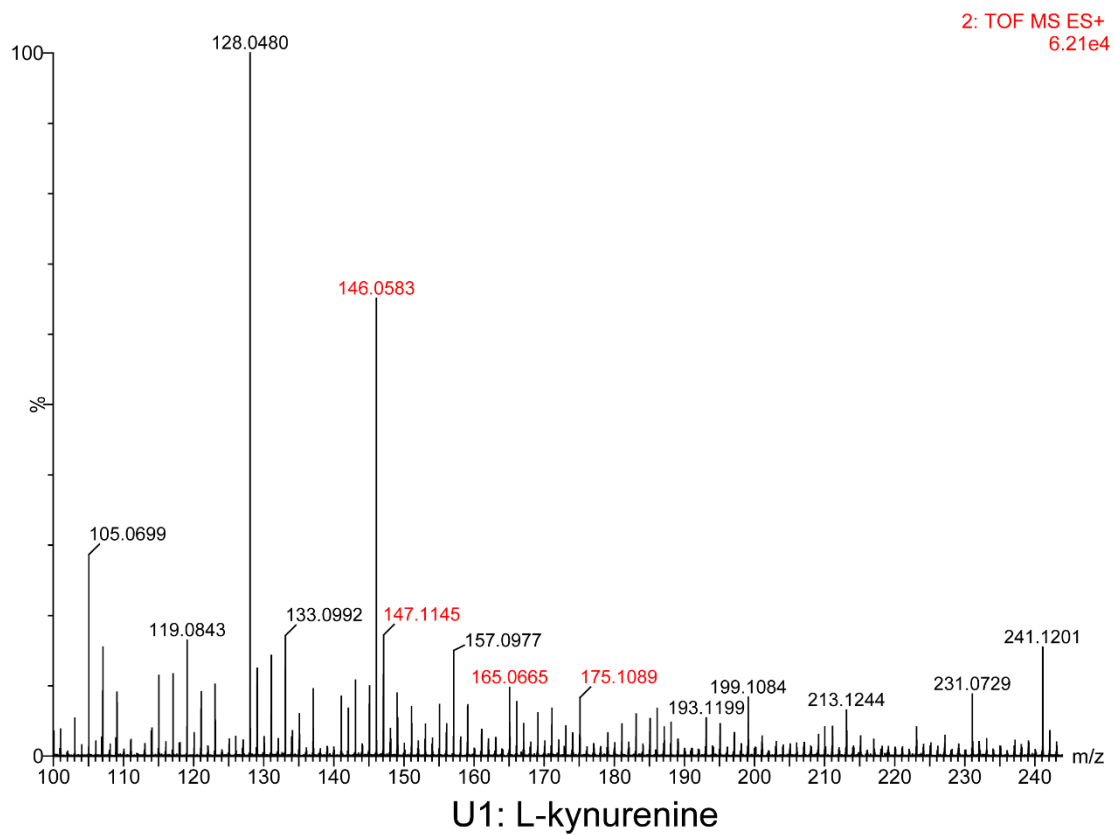

Figure S17: MS/MS spectra of the identified potential marker L-kynurenine in urine samples.

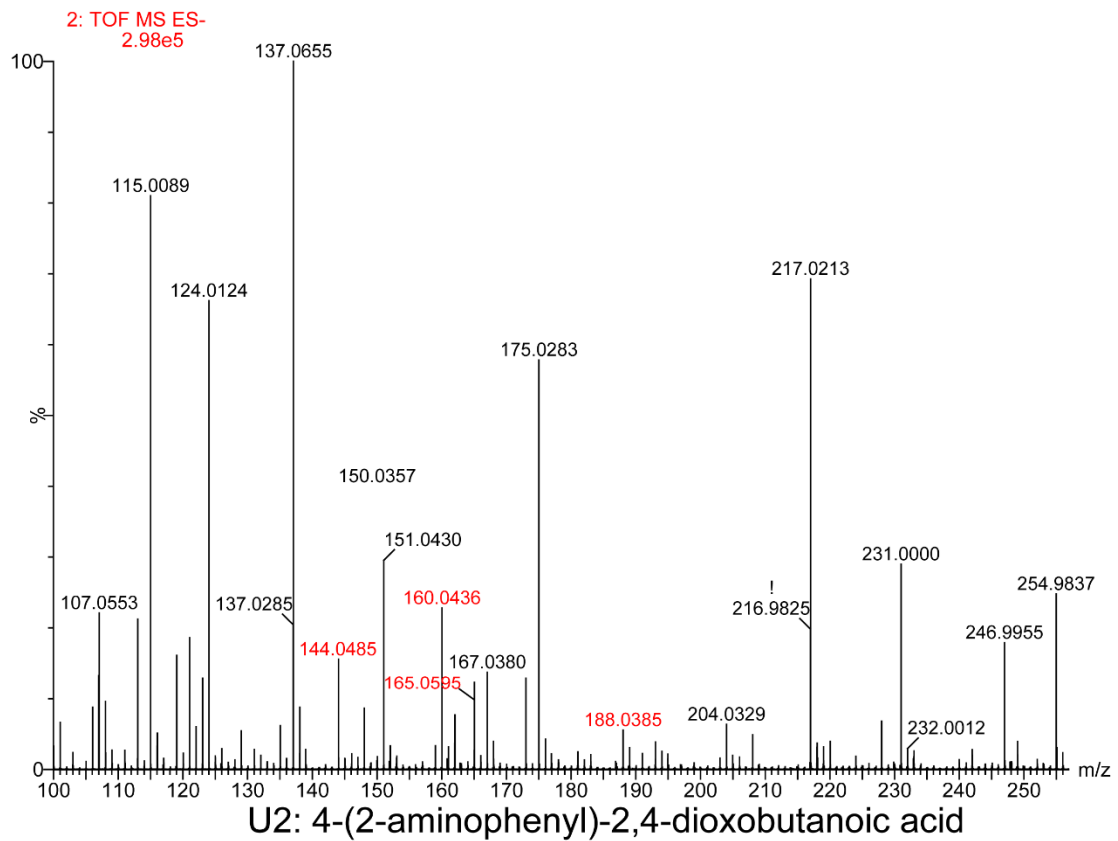

Figure S18: MS/MS spectra of the identified potential marker 4-(2-aminophenyl)-2,4-dioxobutanoic acid in urine samples.

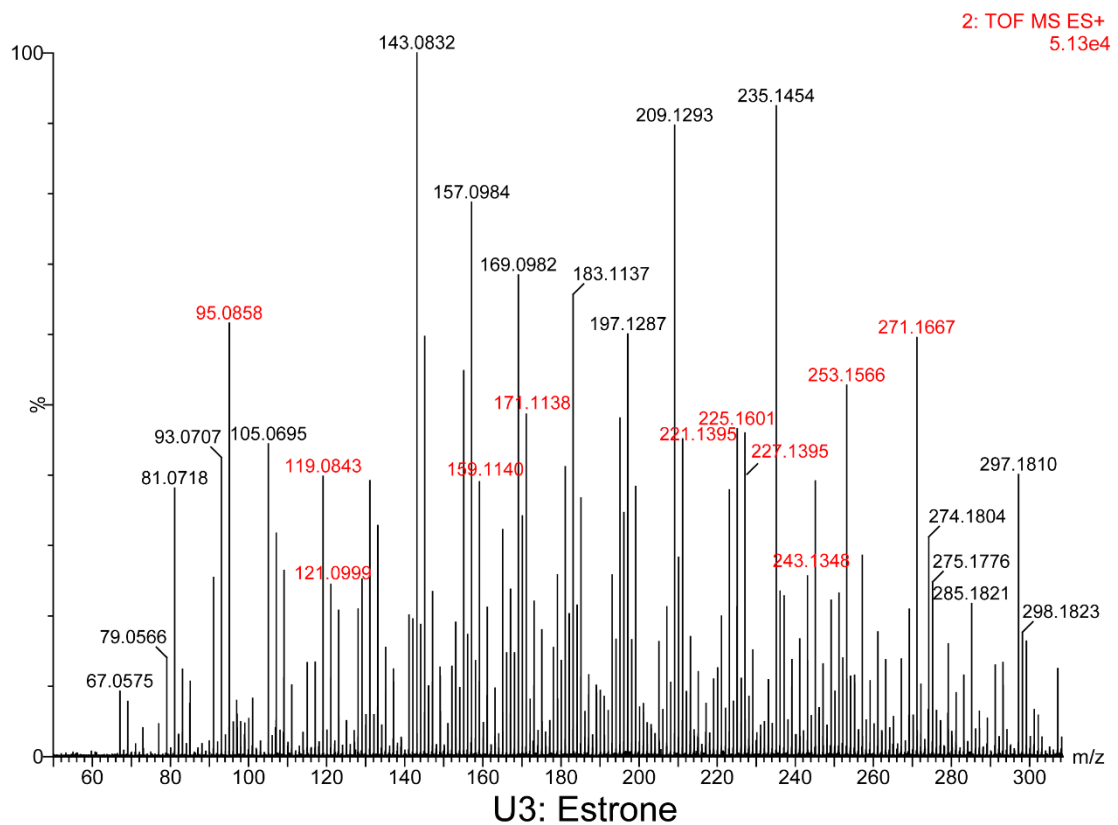



Figure S19: MS/MS spectra of the identified potential marker Estrone in urine samples.

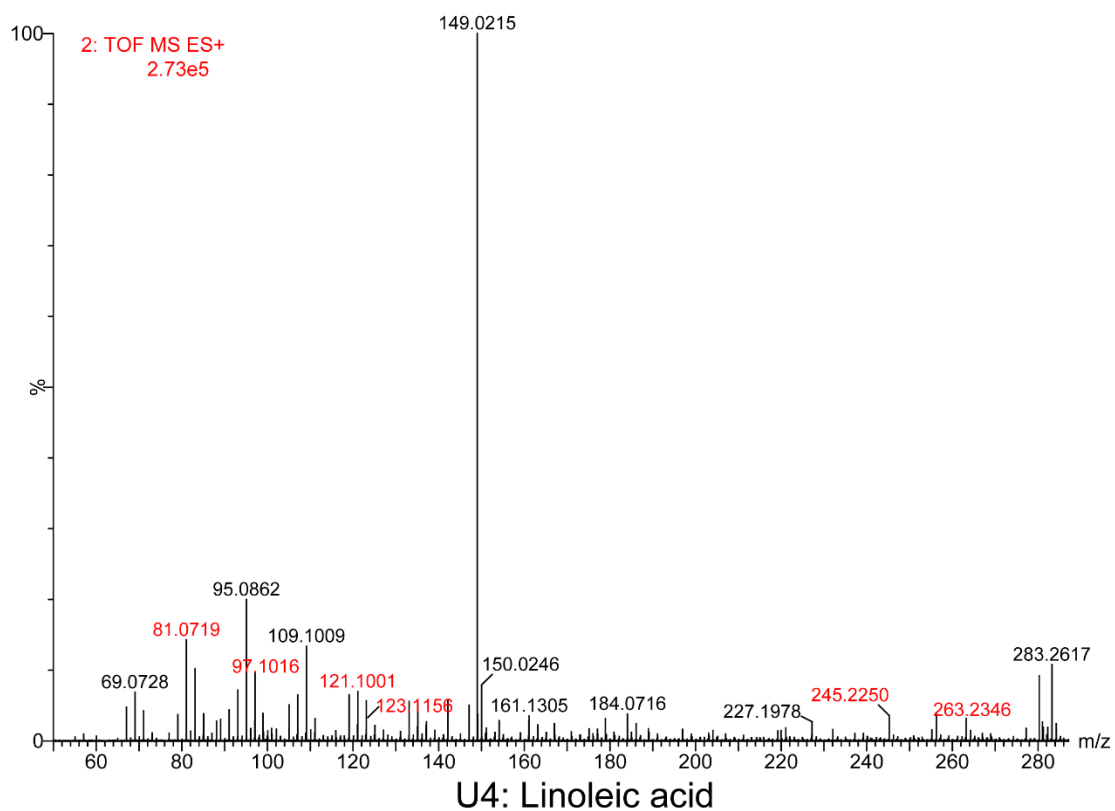

Figure S20: MS/MS spectra of the identified potential marker Linoleic acid in urine samples.

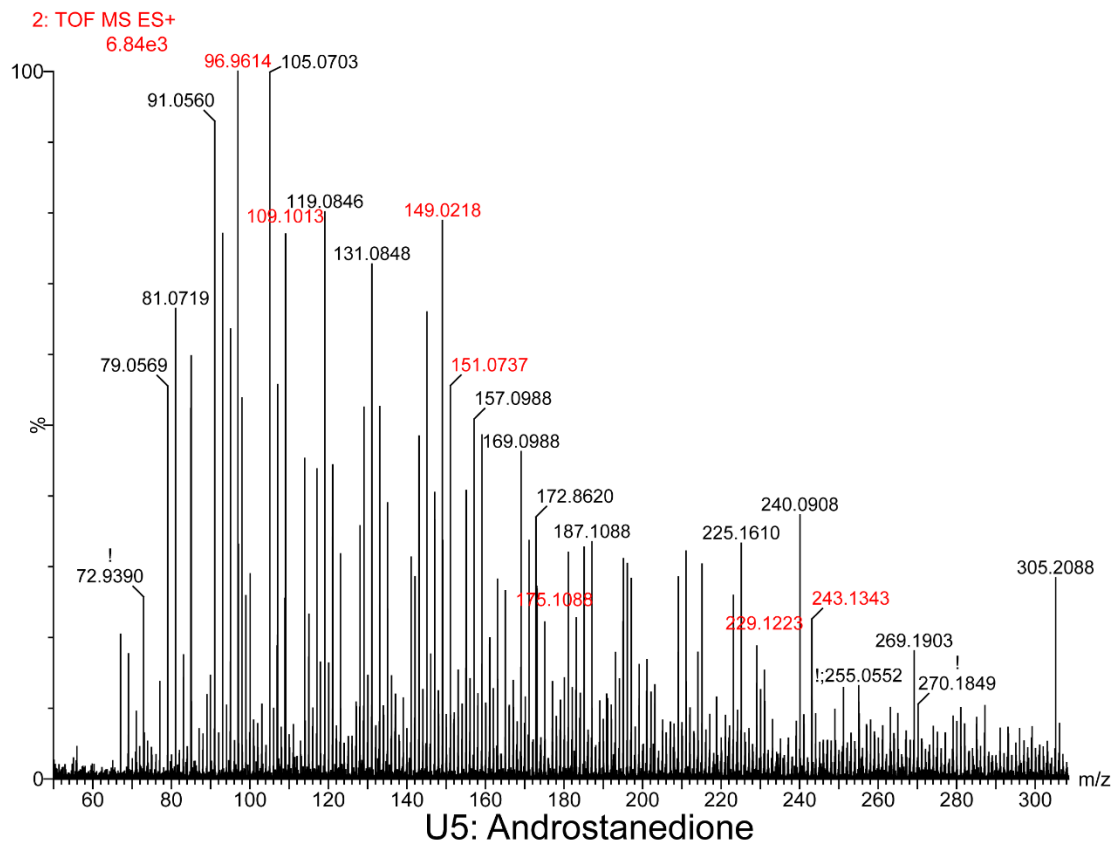

Figure S21: MS/MS spectra of the identified potential marker Androstenedione in urine samples.

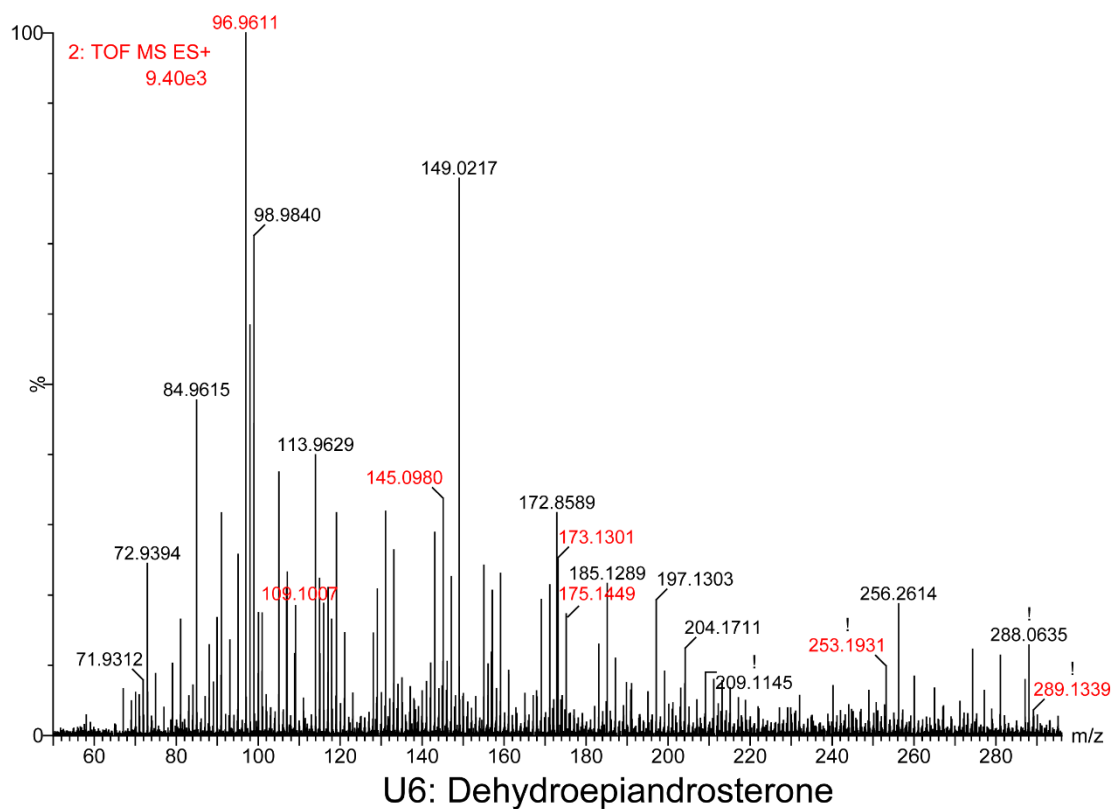

Figure S22: MS/MS spectra of the identified potential marker Dehydroepiandrosterone in urine samples.

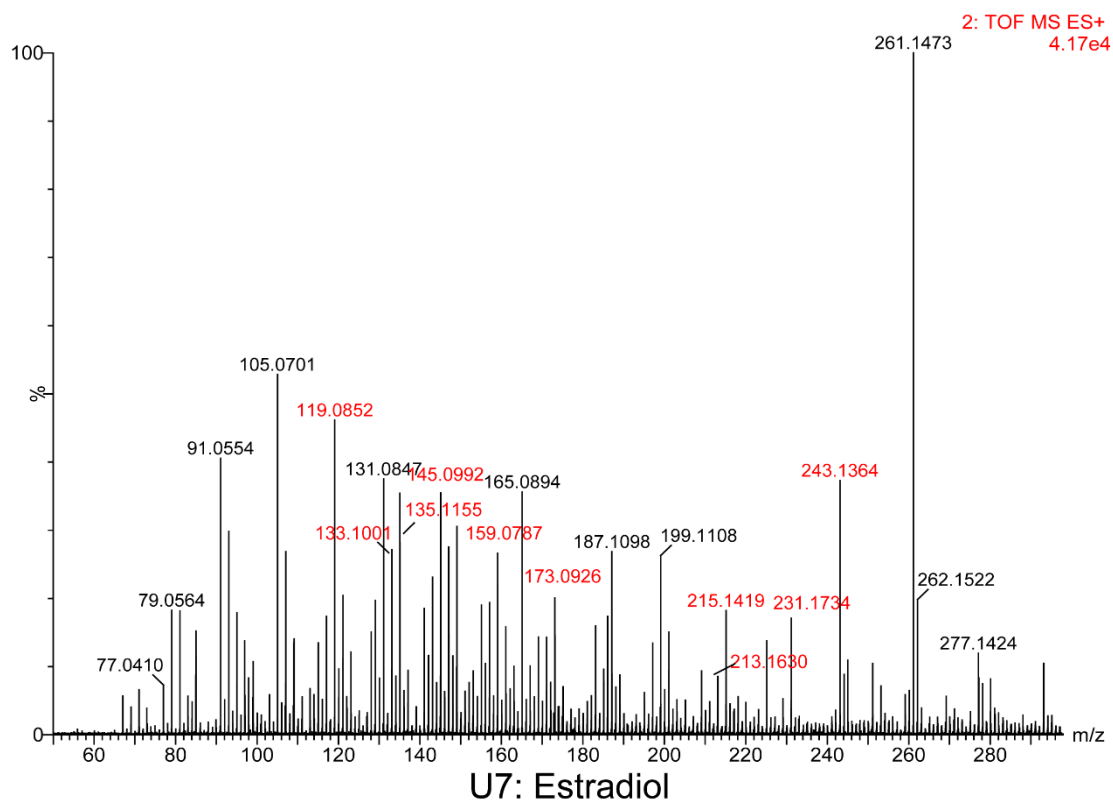

Figure S23: MS/MS spectra of the identified potential marker Estradiol in urine samples.

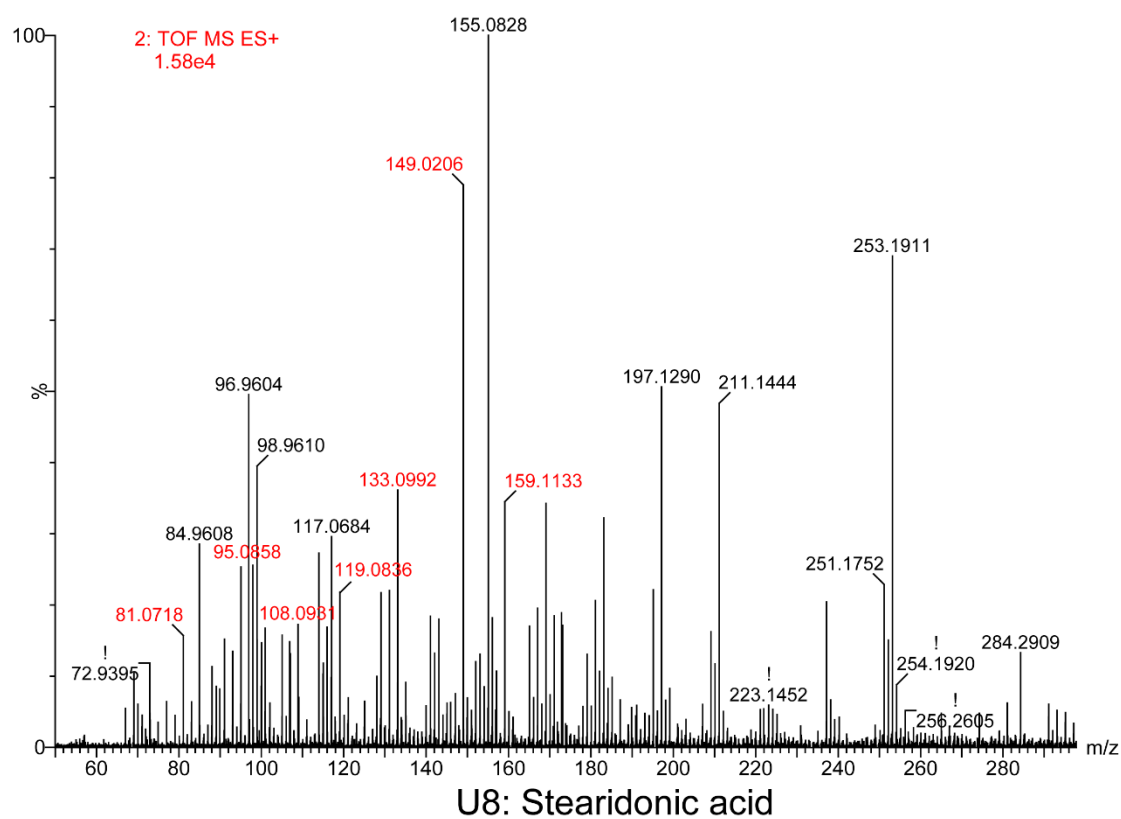

Figure S24: MS/MS spectra of the identified potential marker Stearidonic acid in urine samples.

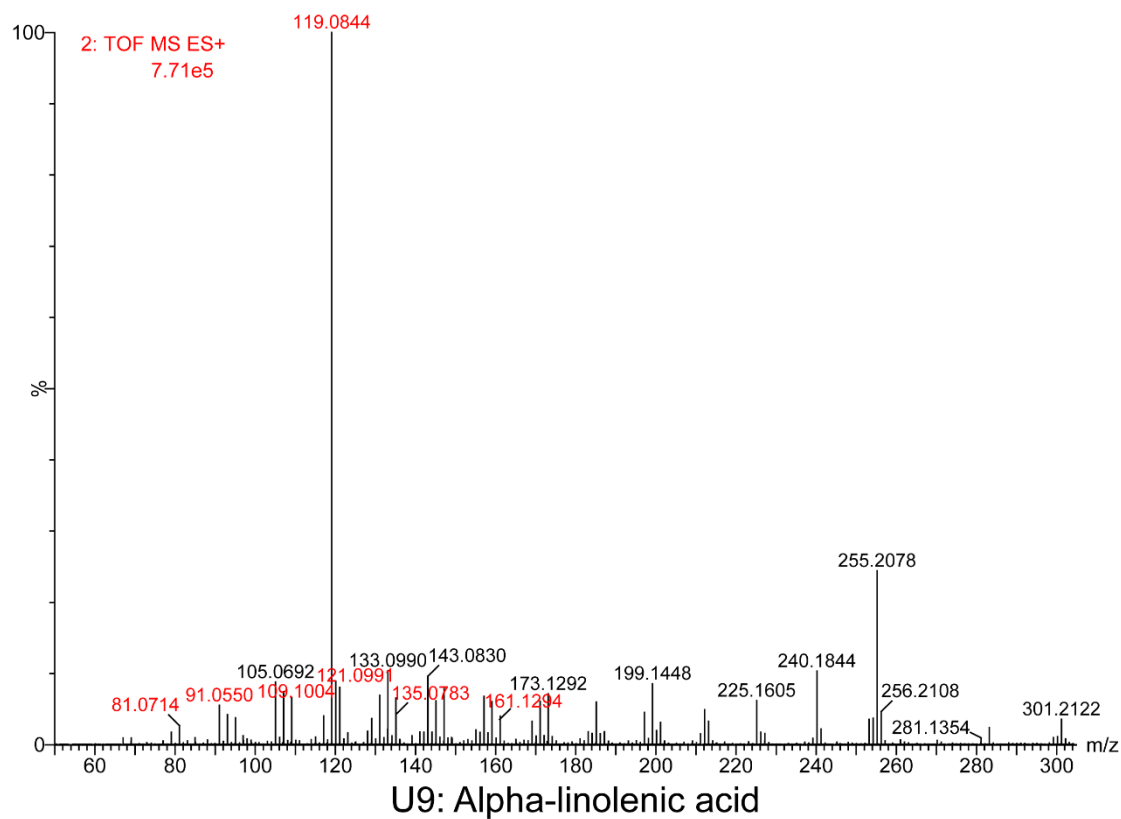

Figure S25: MS/MS spectra of the identified potential marker Alpha-linolenic acid in urine samples.

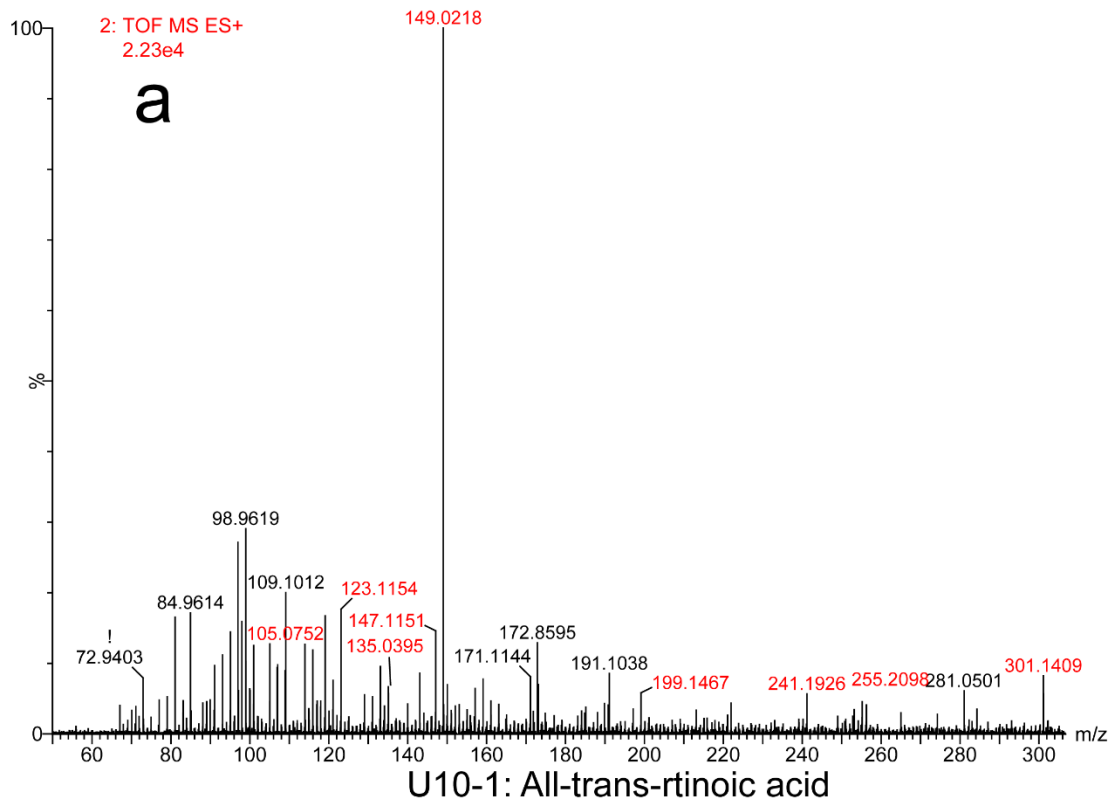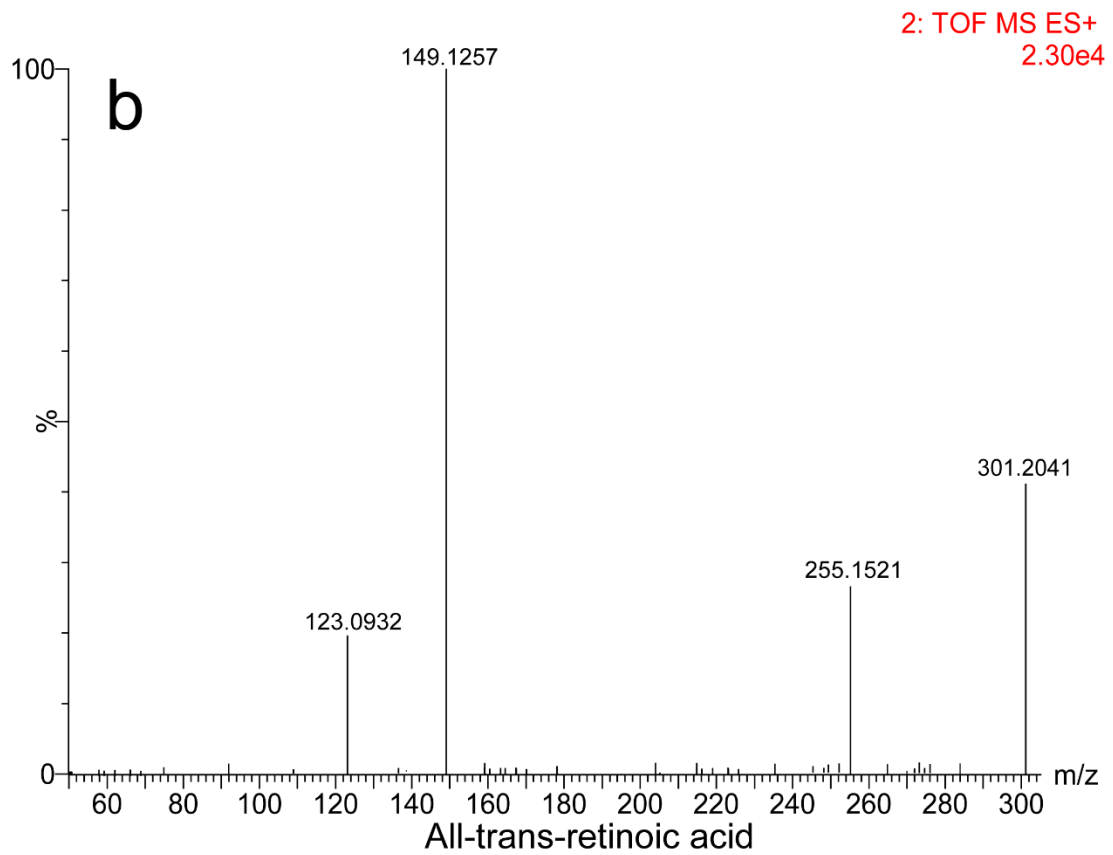

Figure S26: (a) MS/MS spectra of the identified potential marker All-trans-retinoic acid in urine samples. (b) The reference standard chemical spectra of All-trans-retinoic acid in experimental condition.

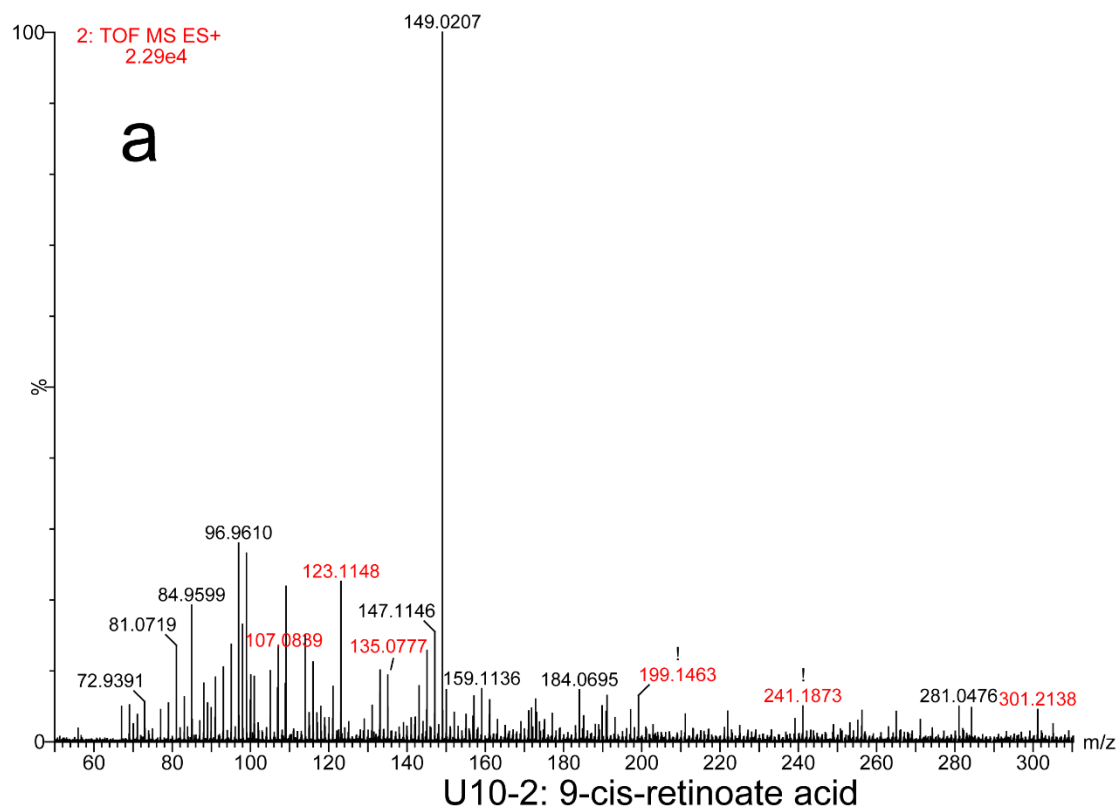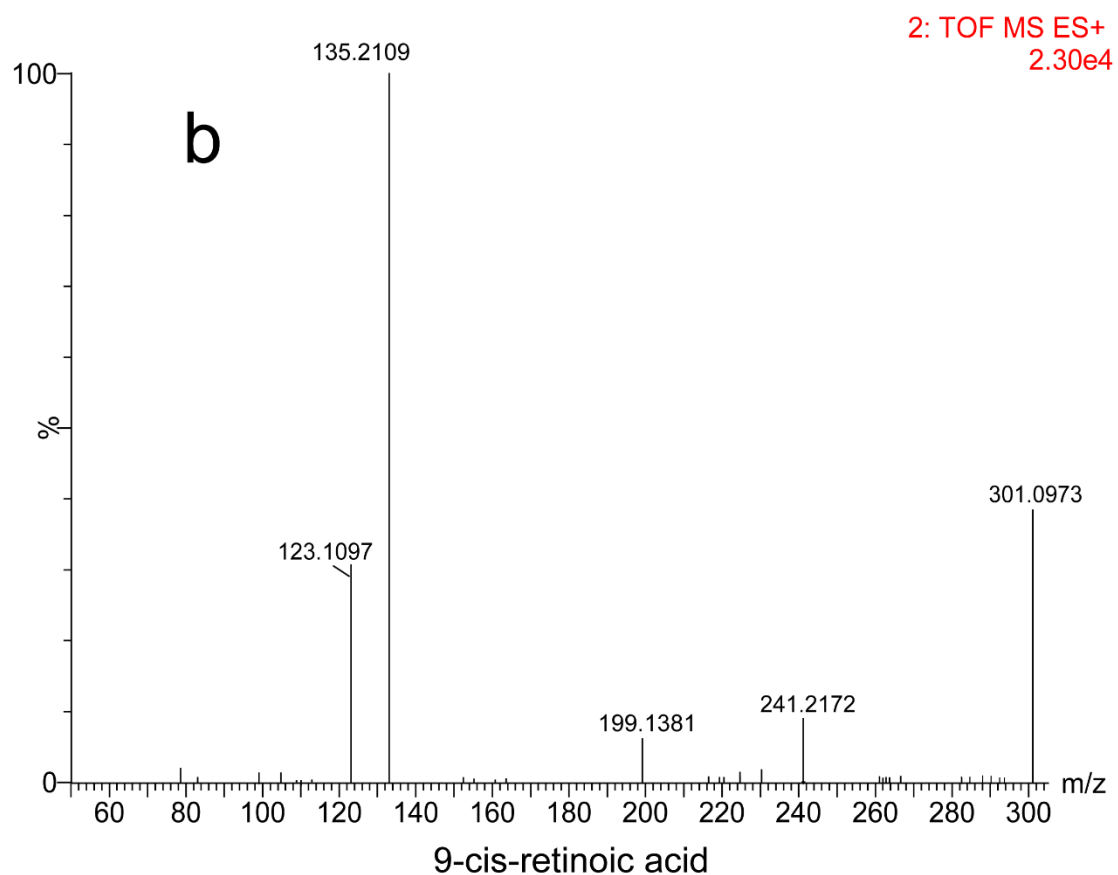

Figure S27: (a) MS/MS spectra of the identified potential marker 9-cis-retinoate acid in urine samples. (b) The reference standard chemical spectra of 9-cis-retinoate acid in experimental

condition.

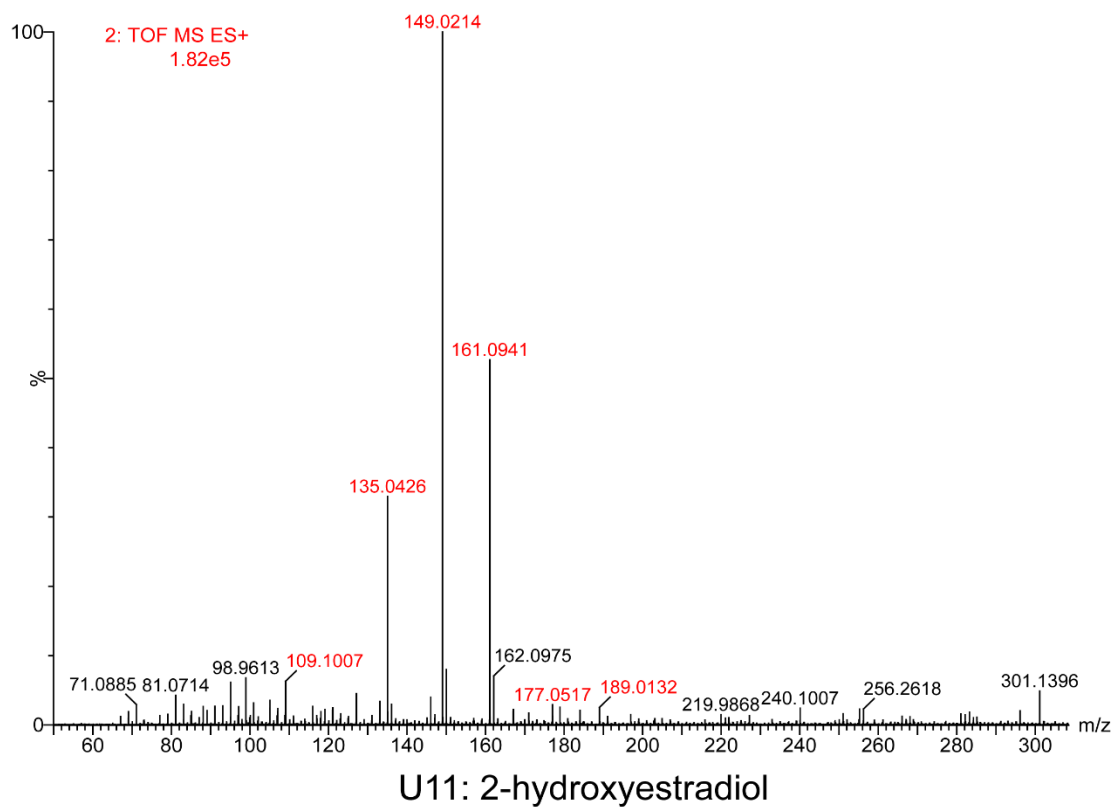

Figure S28: MS/MS spectra of the identified potential marker 2-hydroxyestradiol in urine samples.

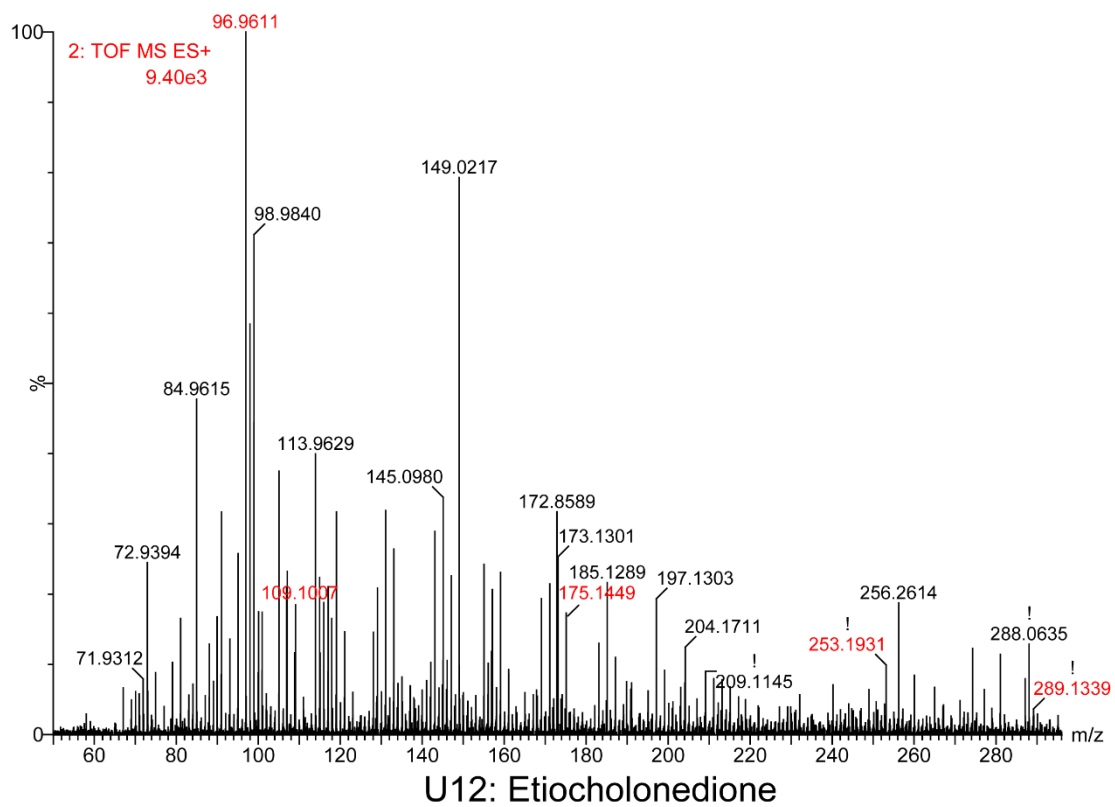

Figure S29: MS/MS spectra of the identified potential marker Etiocholonedione in urine samples.

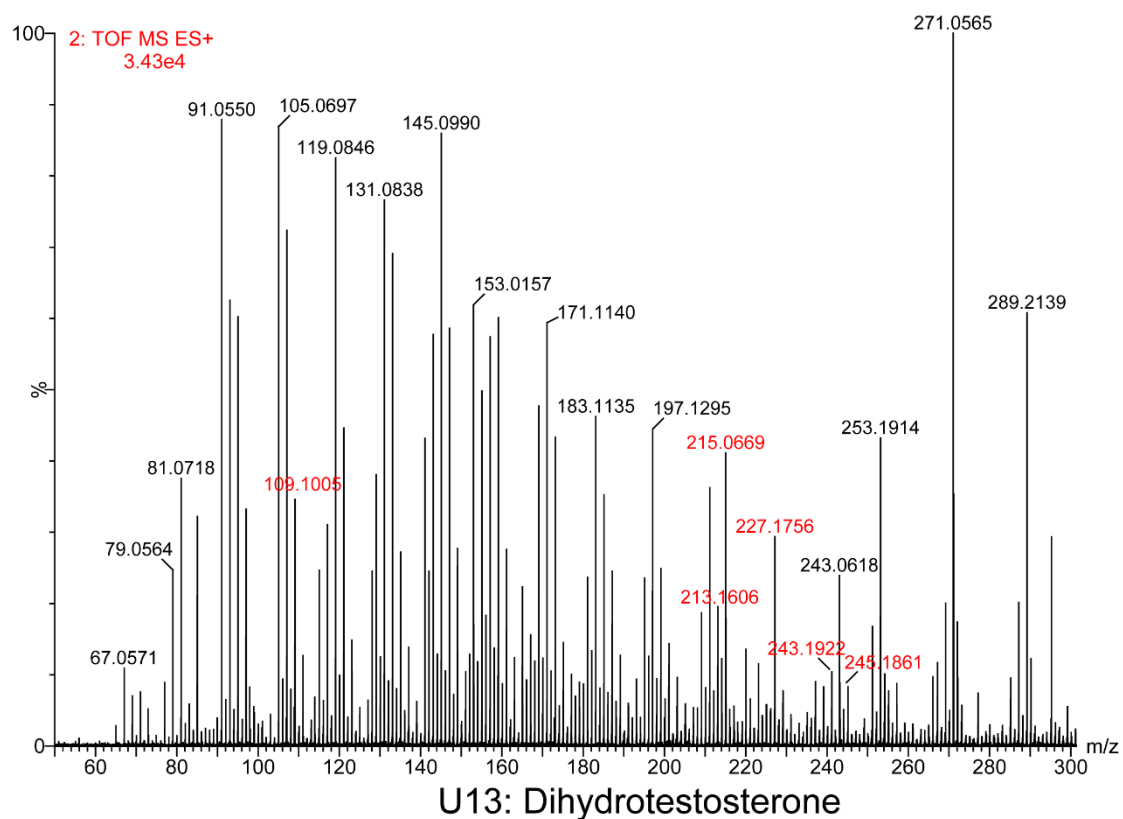

Figure S30: MS/MS spectra of the identified potential marker Dihydrotestosterone in urine samples.

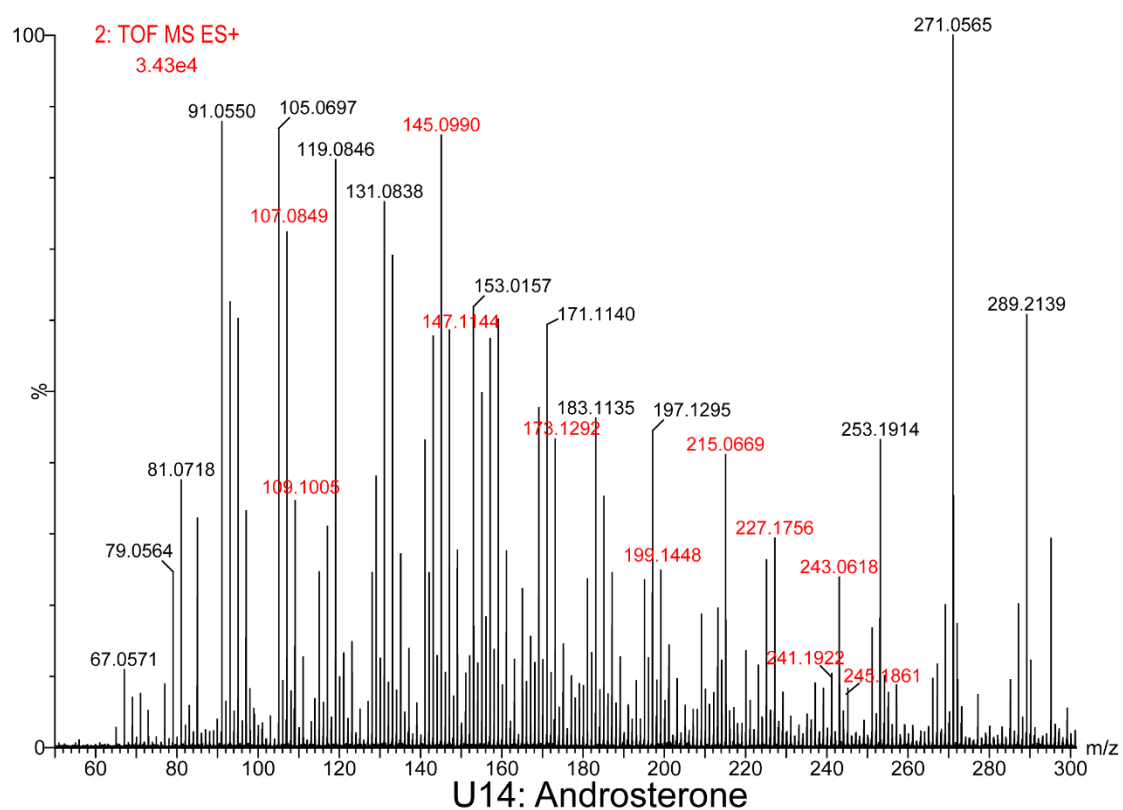

Figure S31: MS/MS spectra of the identified potential marker Androsterone in urine samples.

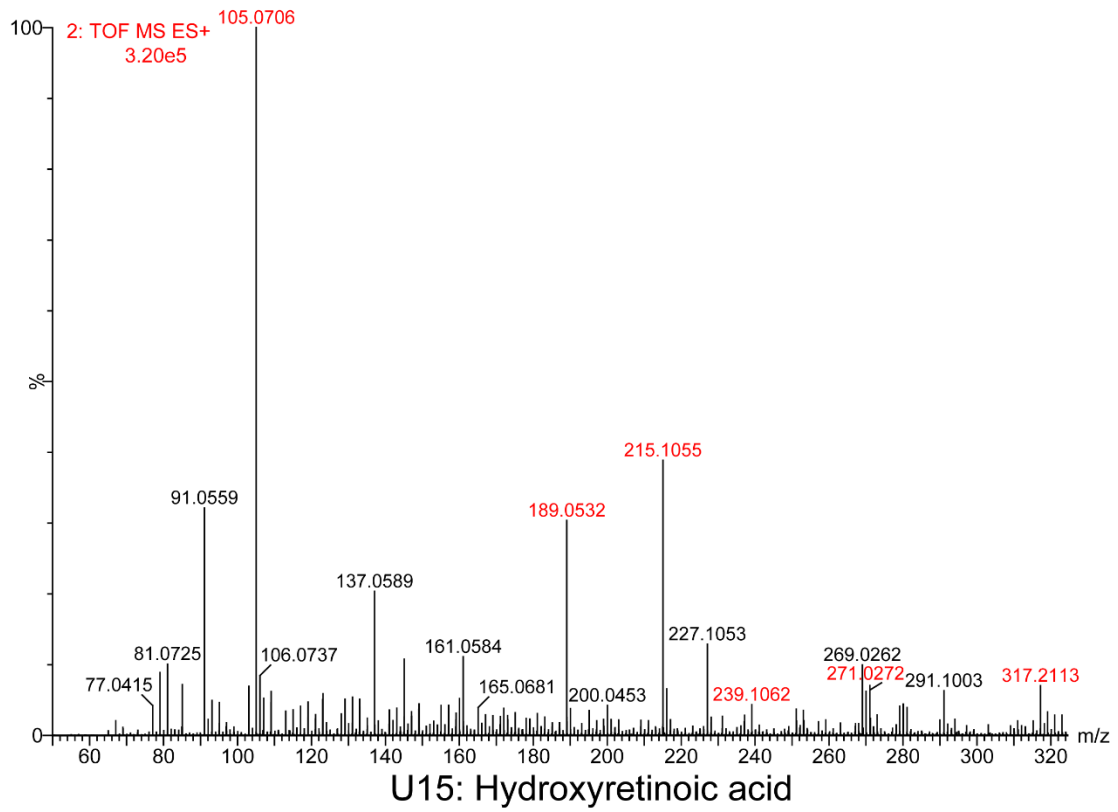

Figure S32: MS/MS spectra of the identified potential marker Hydroxyretinoic acid in urine samples.

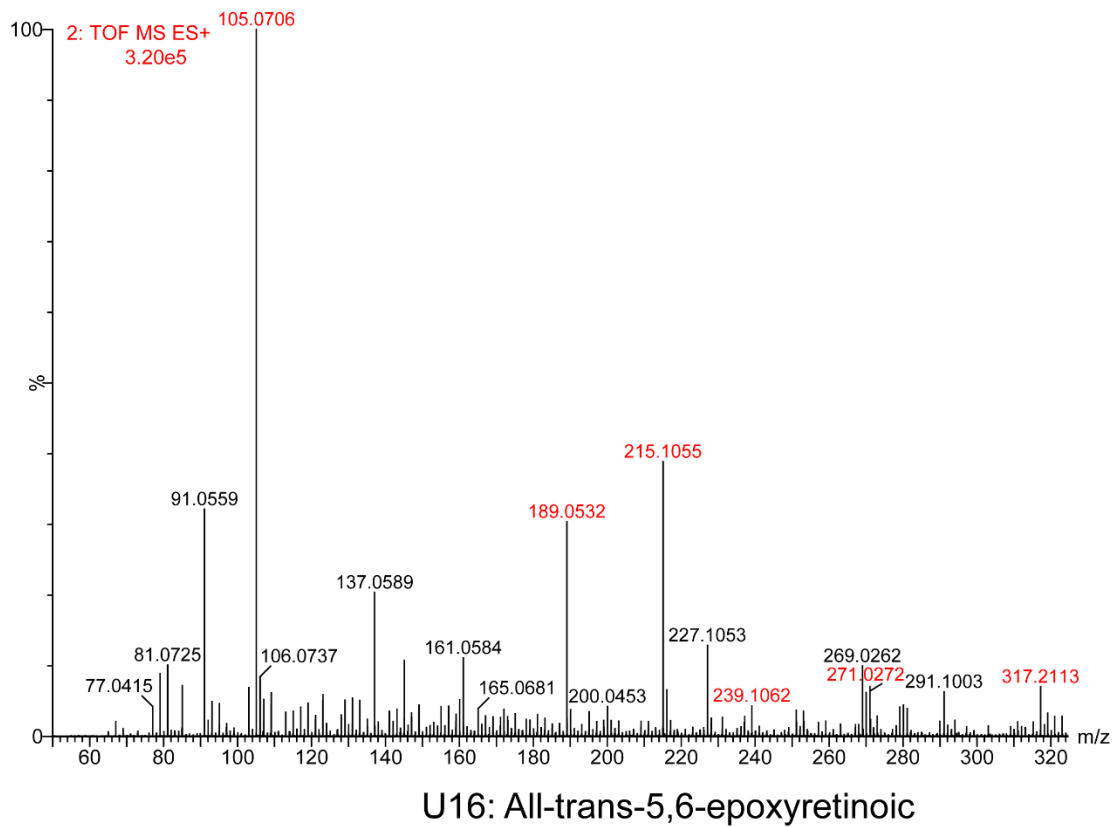



Figure S33: MS/MS spectra of the identified potential marker All-trans-5,6-epoxyretinoic in urine samples.

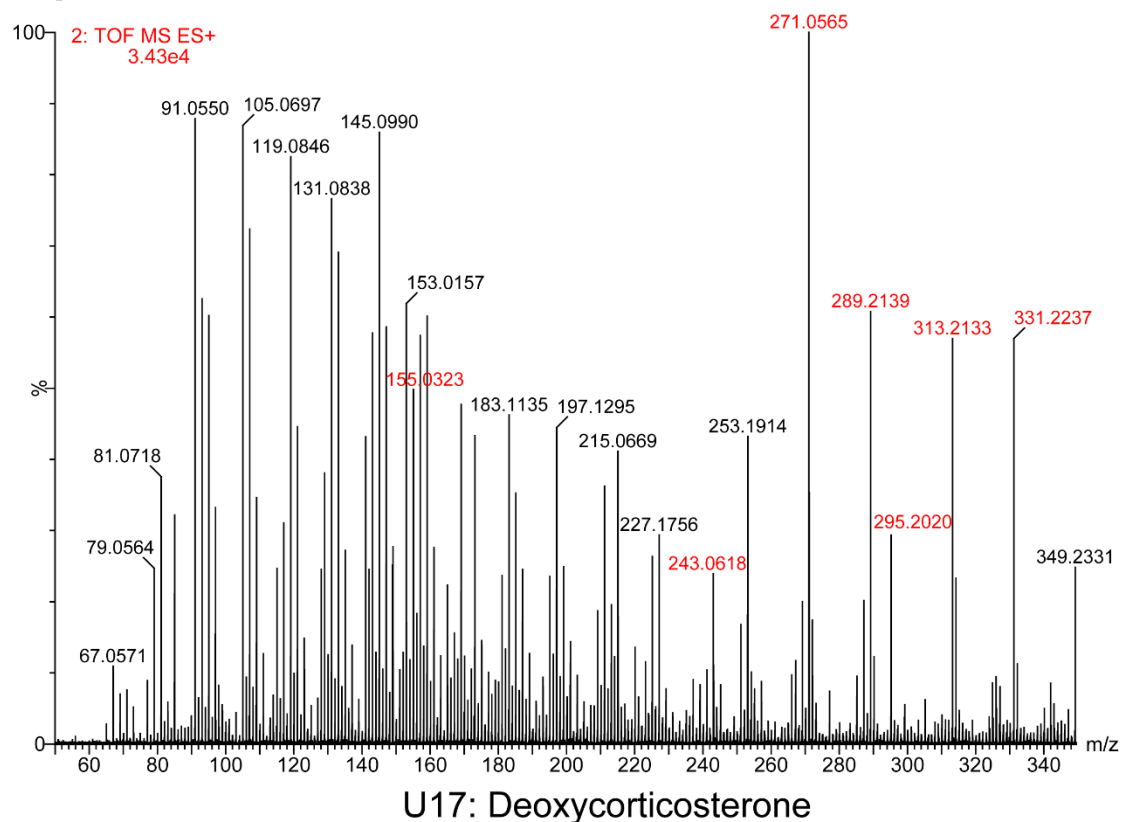

Figure S34: MS/MS spectra of the identified potential marker Deoxycorticosterone in urine samples.

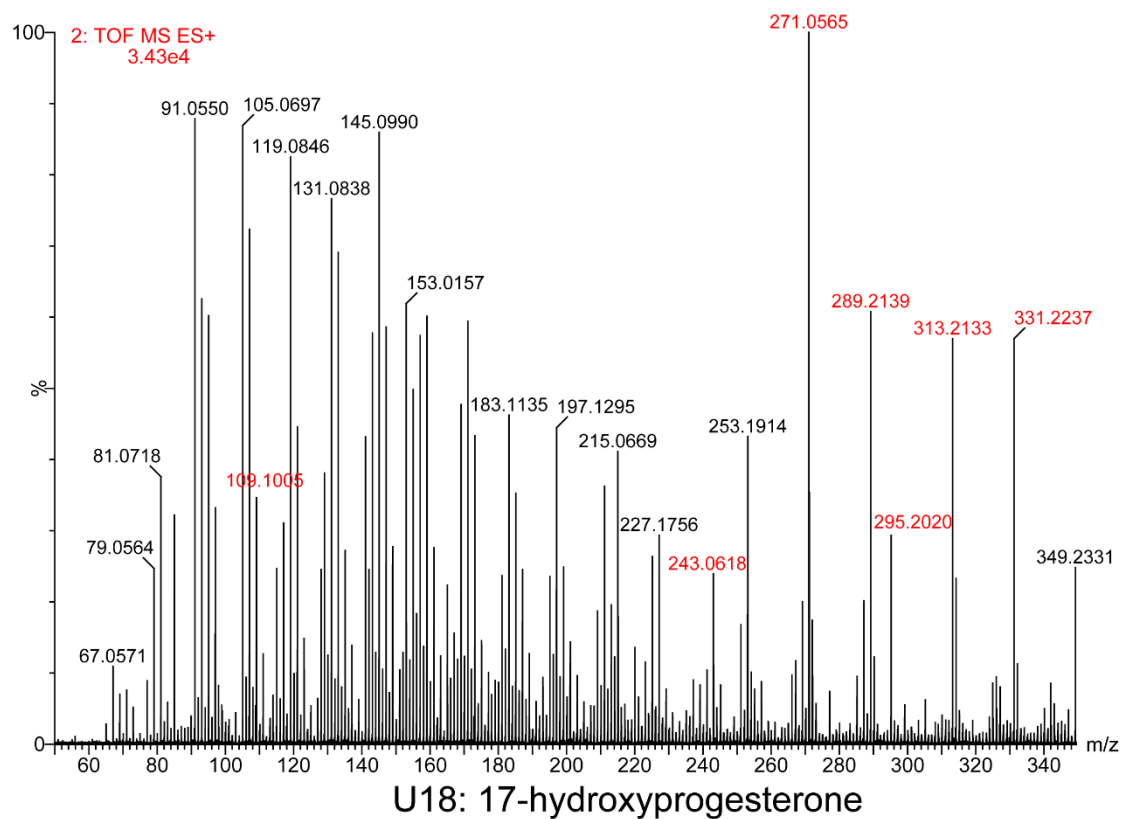

Figure S35: MS/MS spectra of the identified potential marker 17-hydroxyprogesterone in urine samples.

samples.

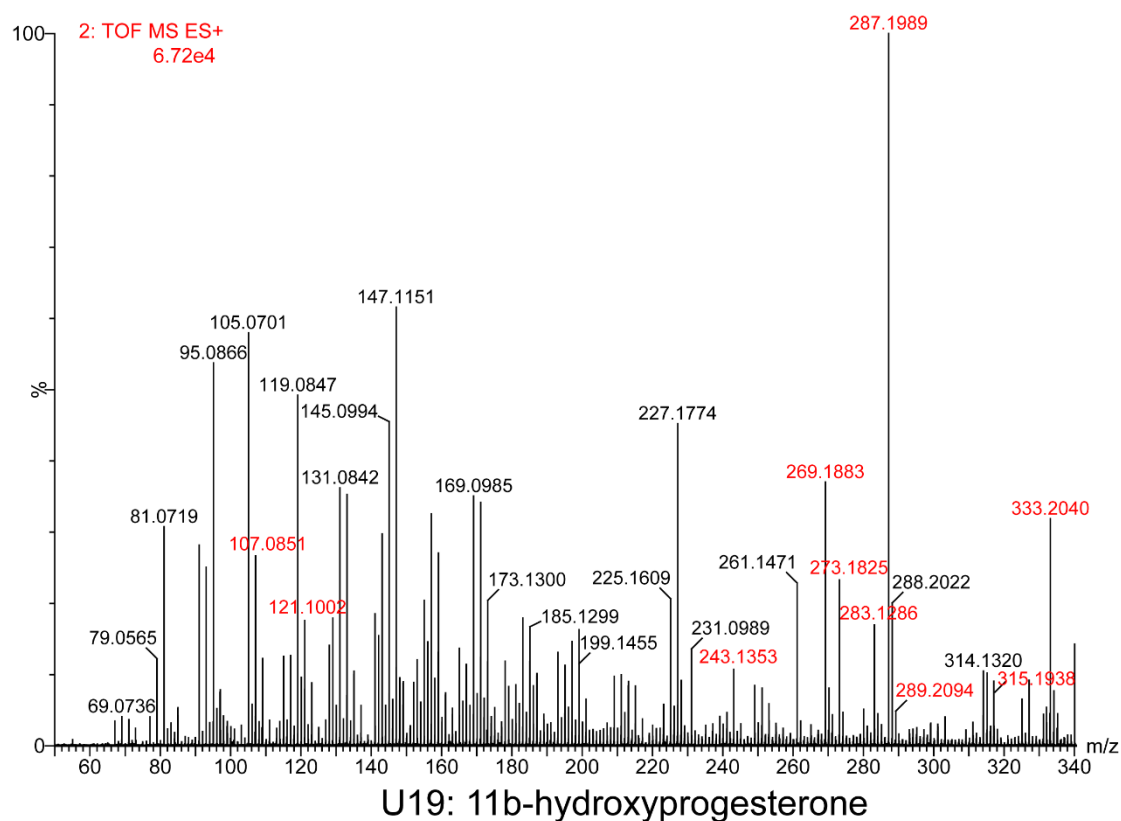

Figure S36: MS/MS spectra of the identified potential marker 11b-hydroxyprogesterone in urine samples.

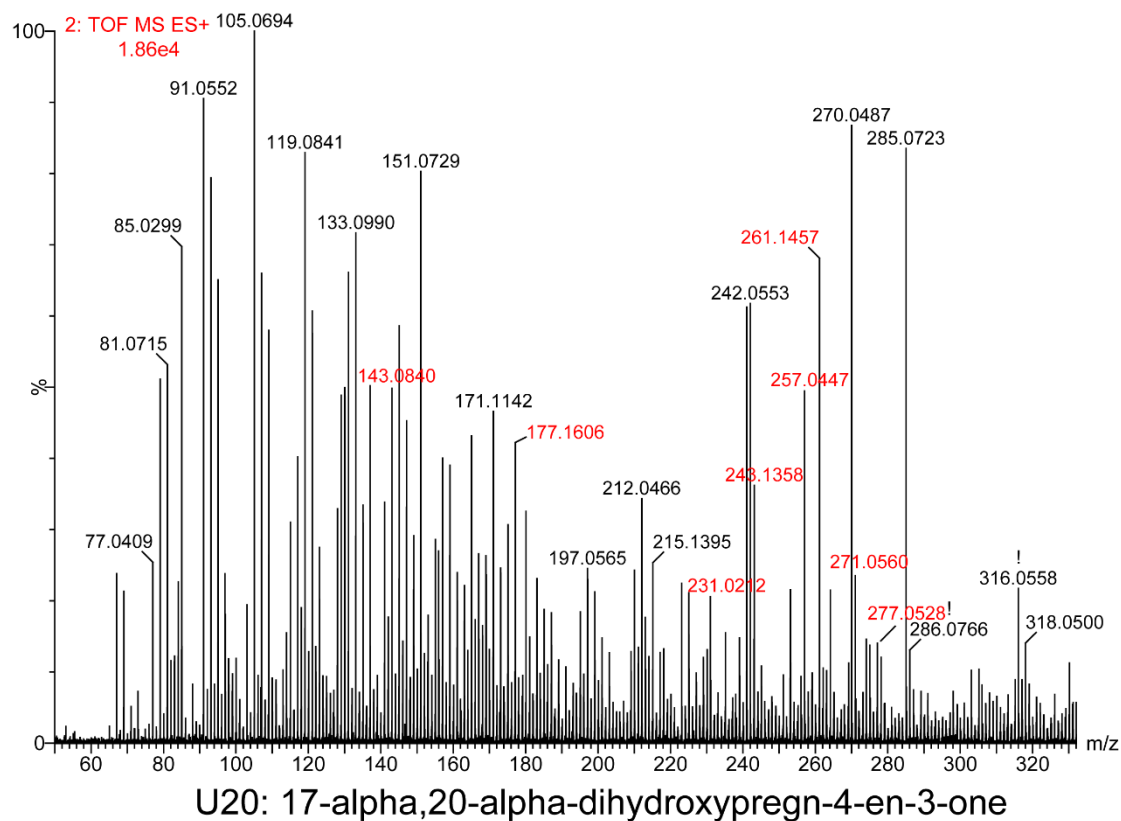

Figure S37: MS/MS spectra of the identified potential marker 17-alpha,20-alpha-dihydroxypregn-4-

en-3-one in urine samples.

2: TOF MS ES+  
4.13e3

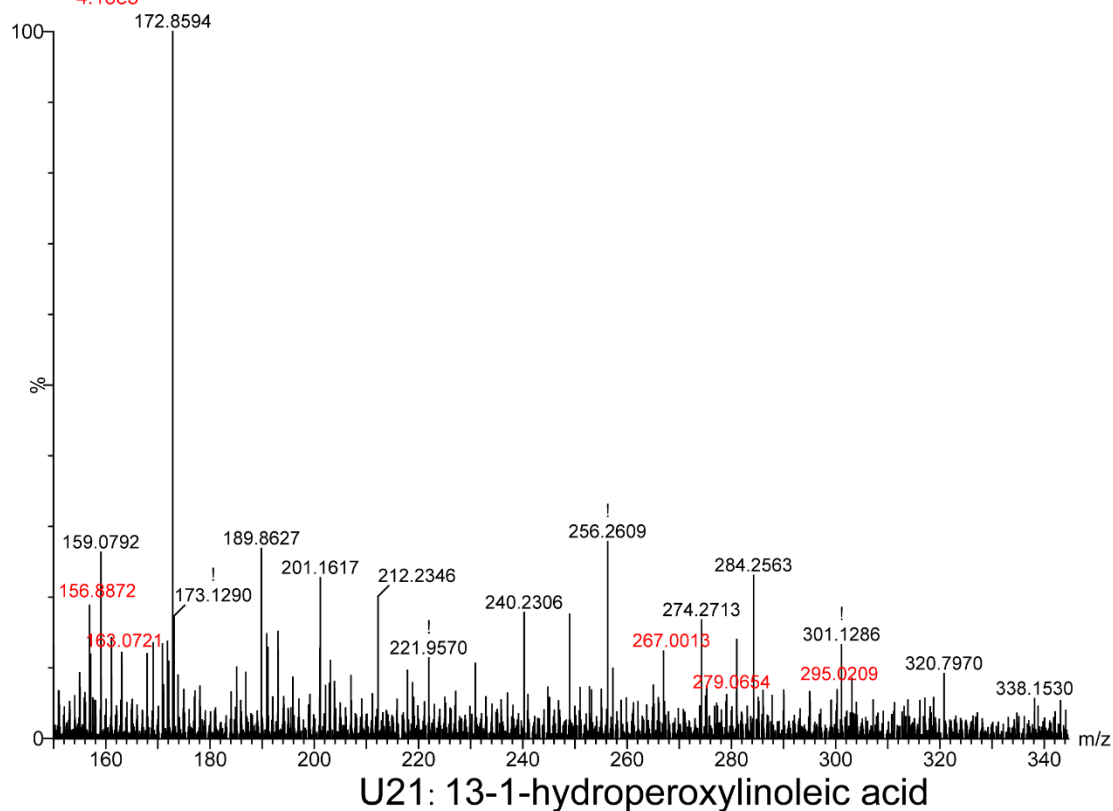

Figure S38: MS/MS spectra of the identified potential marker 13-l-hydroperoxylinoleic acid in urine samples.

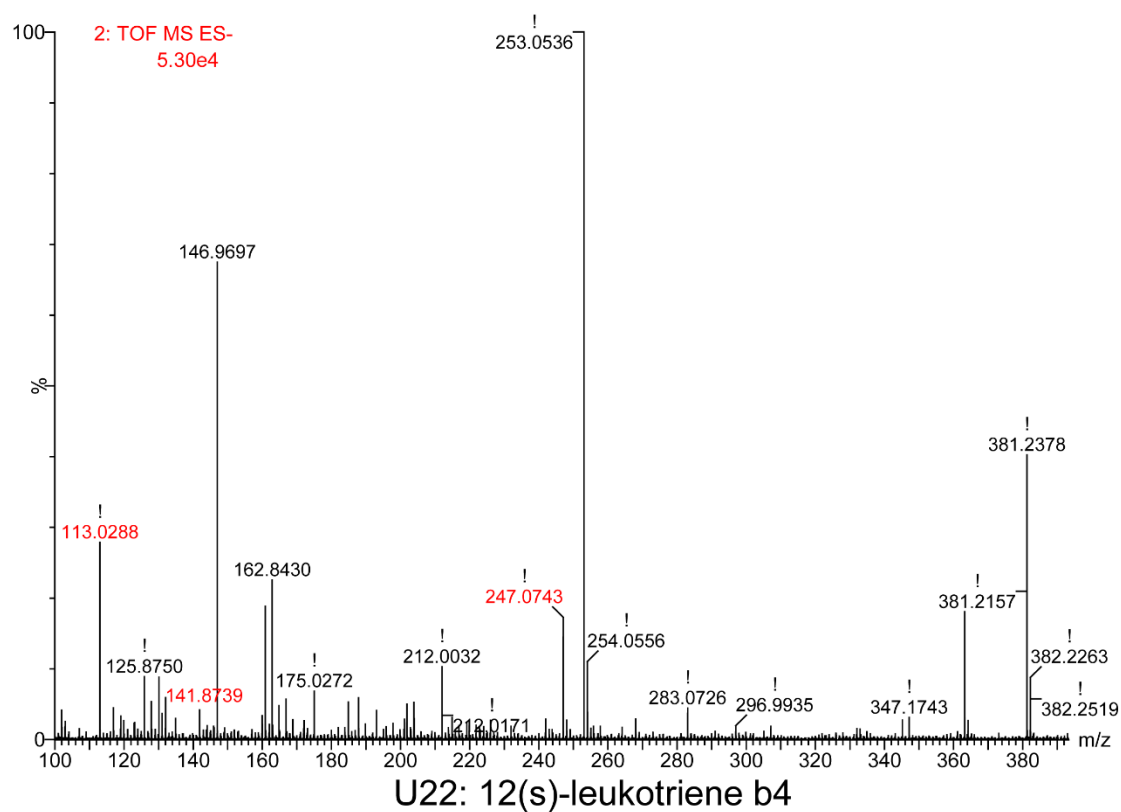

Figure S39: MS/MS spectra of the identified potential marker 12(s)-leukotriene b4 in urine samples.

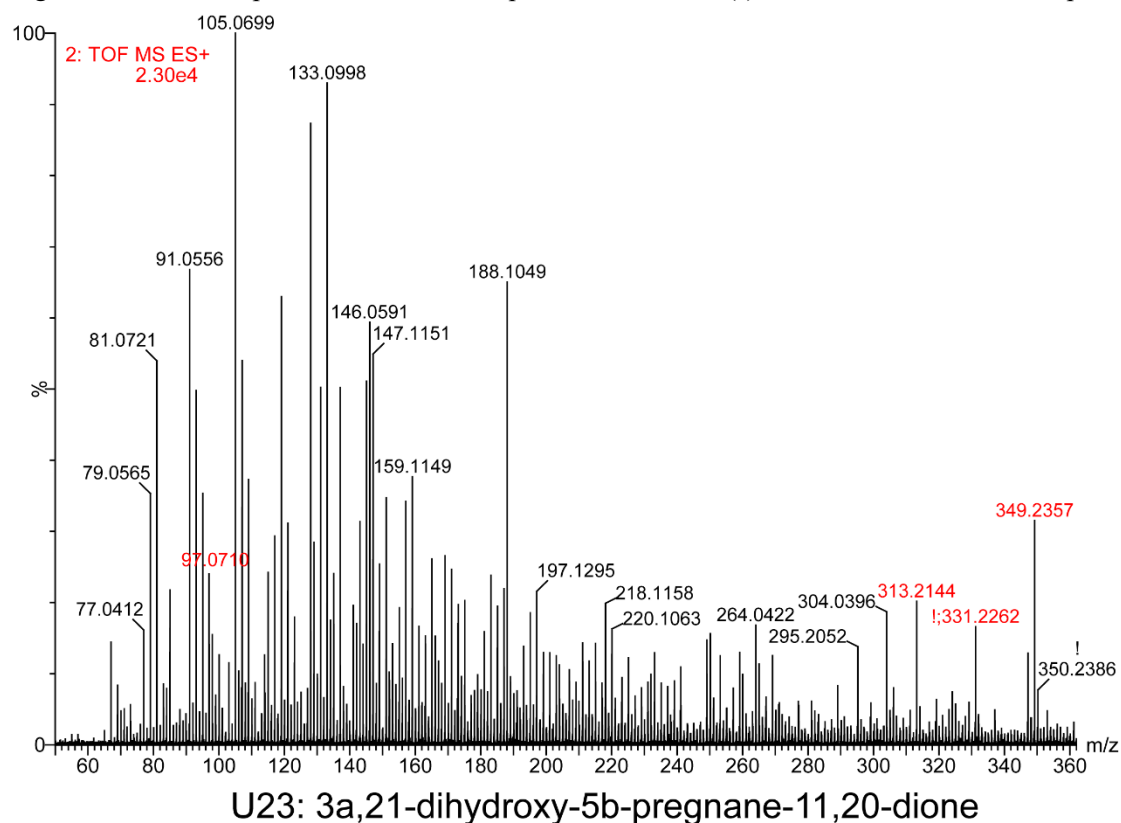

Figure S40: MS/MS spectra of the identified potential marker 3a,21-dihydroxy-5b-pregnane-11,20-dione in urine samples.

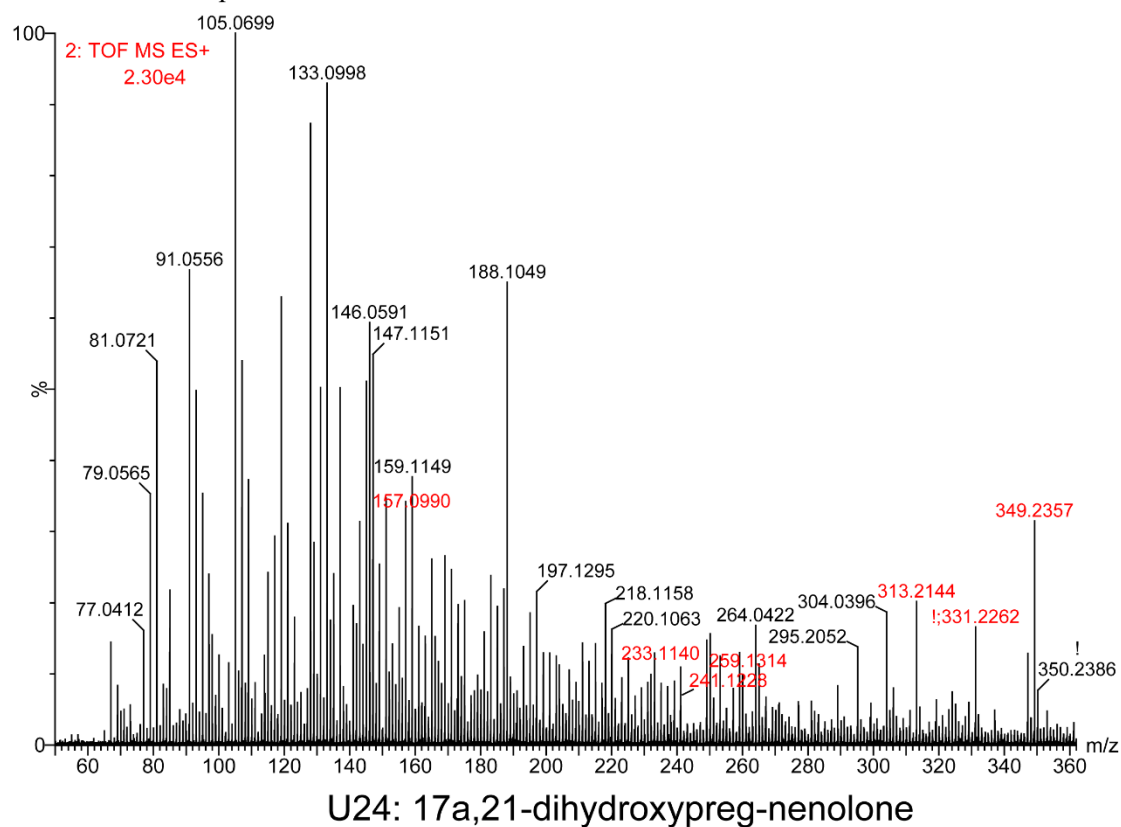

Figure S41: MS/MS spectra of the identified potential marker 17a,21-dihydroxypreg-nenolone in

urine samples.

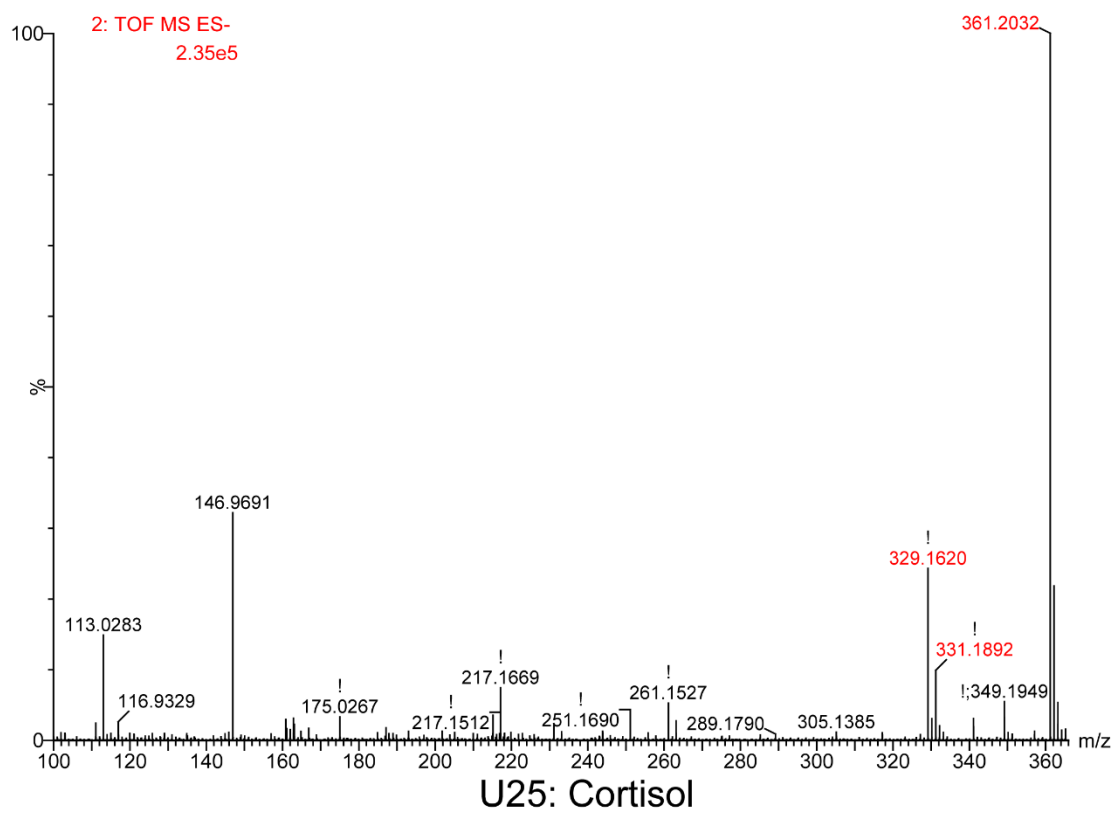

Figure S42: MS/MS spectra of the identified potential marker Cortisol in urine samples.

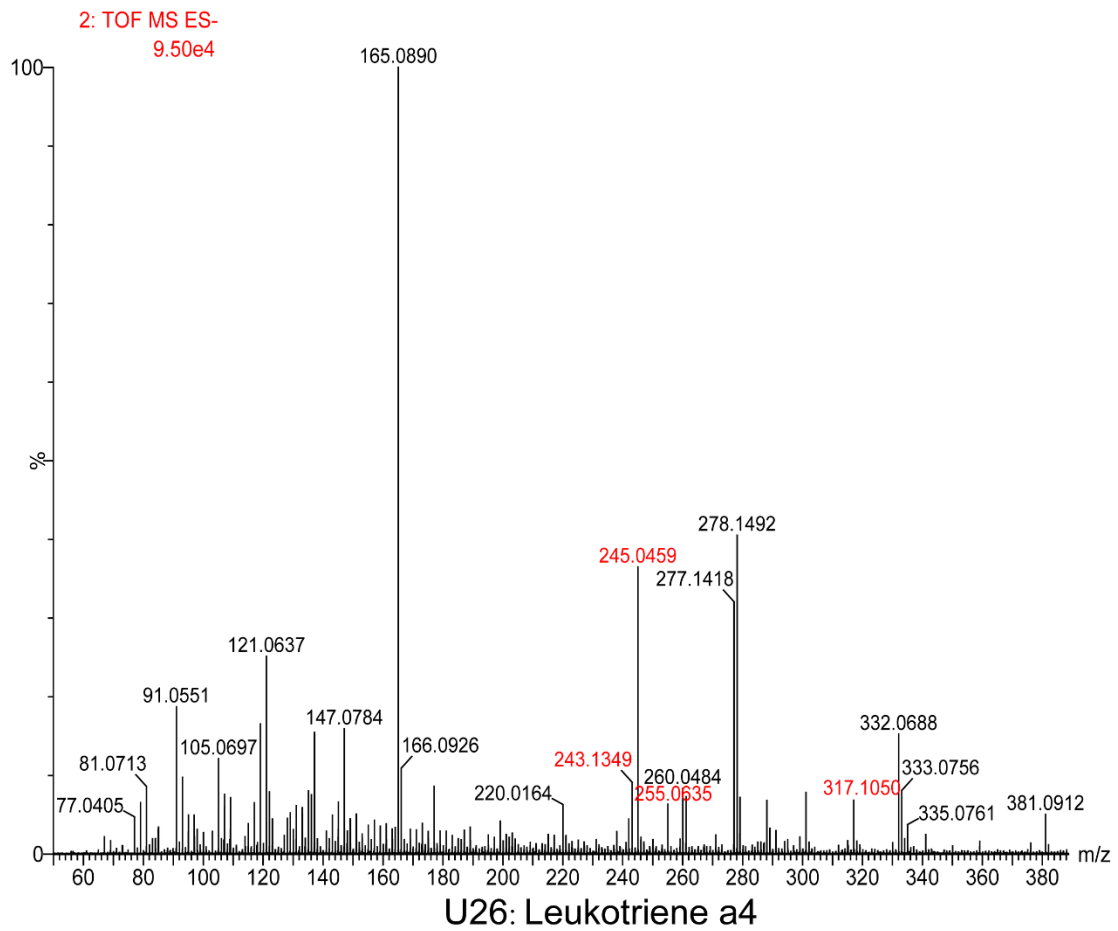

Figure S43: MS/MS spectra of the identified potential marker Leukotriene a4 in urine samples.

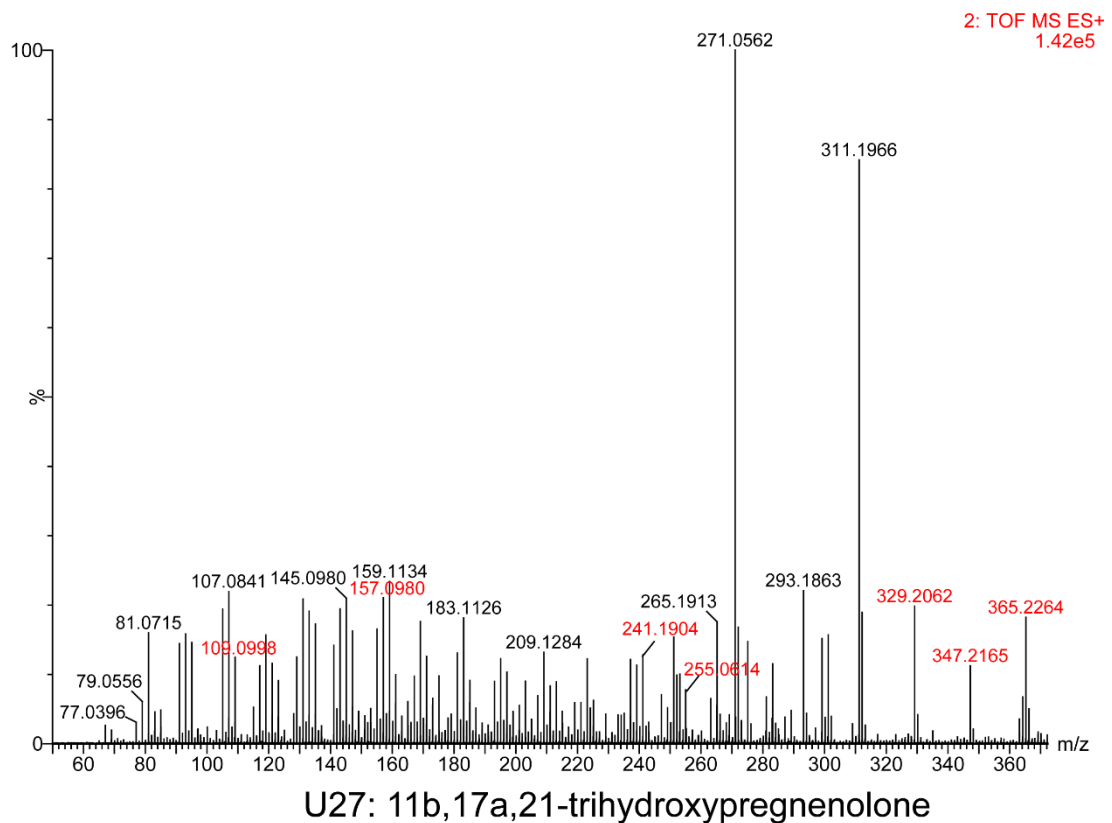

Figure S44: MS/MS spectra of the identified potential marker 11b,17a,21-trihydroxypreg-nenolone in urine samples.

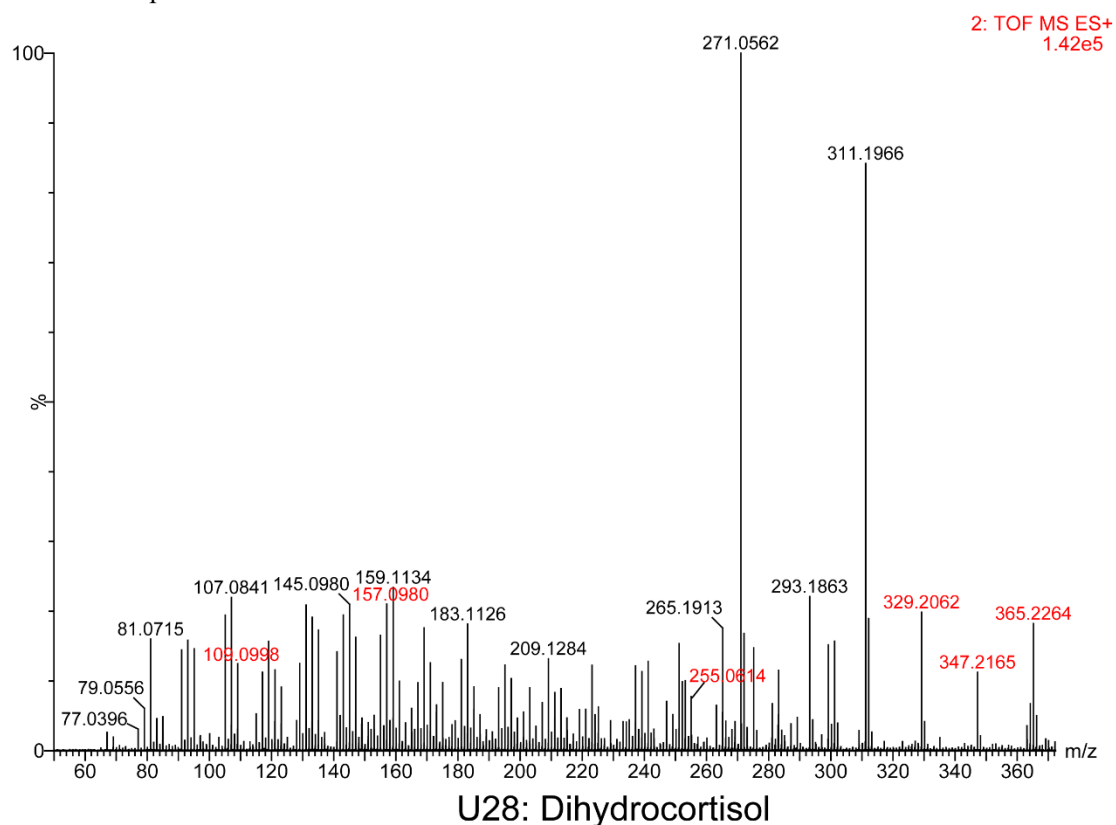

Figure S45: MS/MS spectra of the identified potential marker Dihydrocortisol in urine samples.

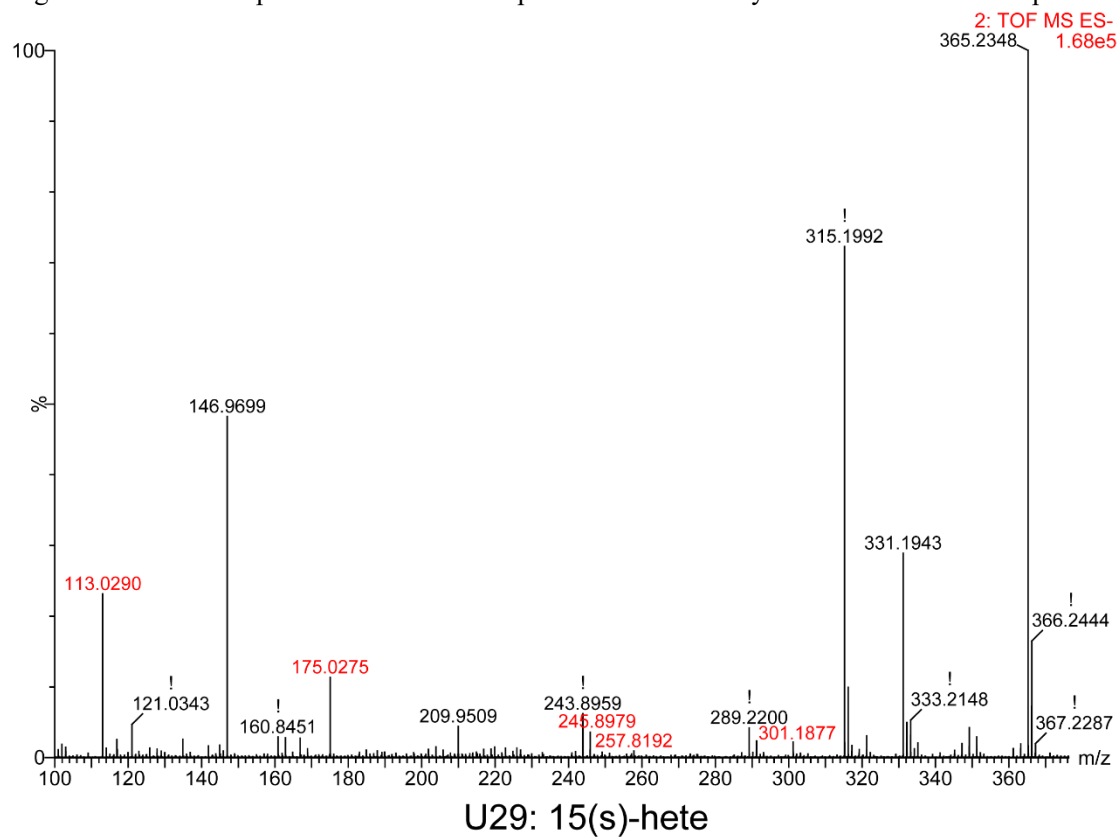

Figure S46: MS/MS spectra of the identified potential marker 15(s)-hete in urine samples.

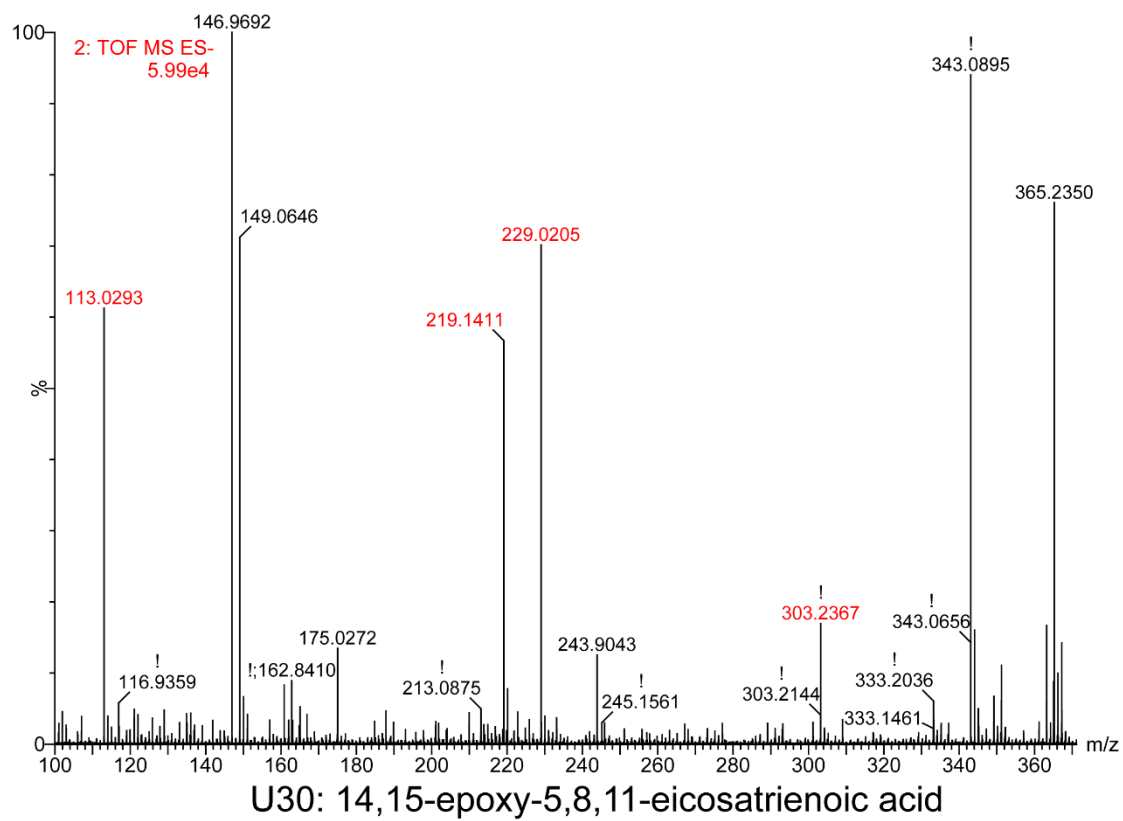

Figure S47: MS/MS spectra of the identified potential marker 14,15-epoxy-5,8,11-eicosatrienoic acid in urine samples.



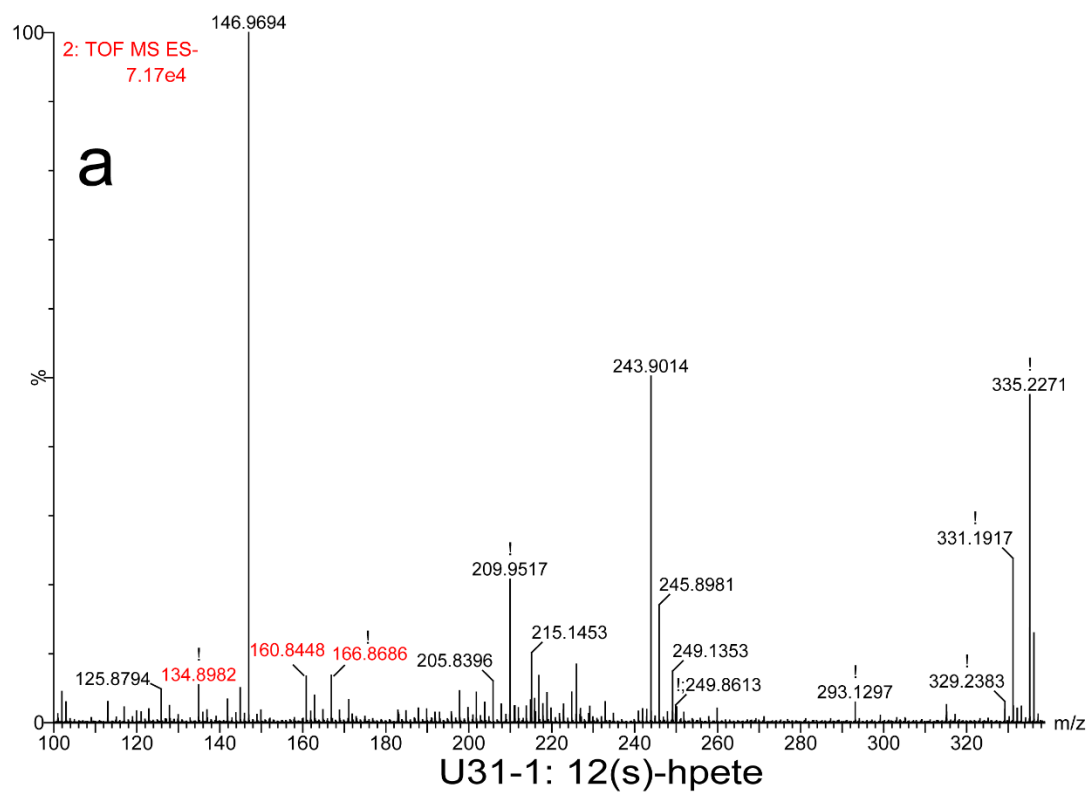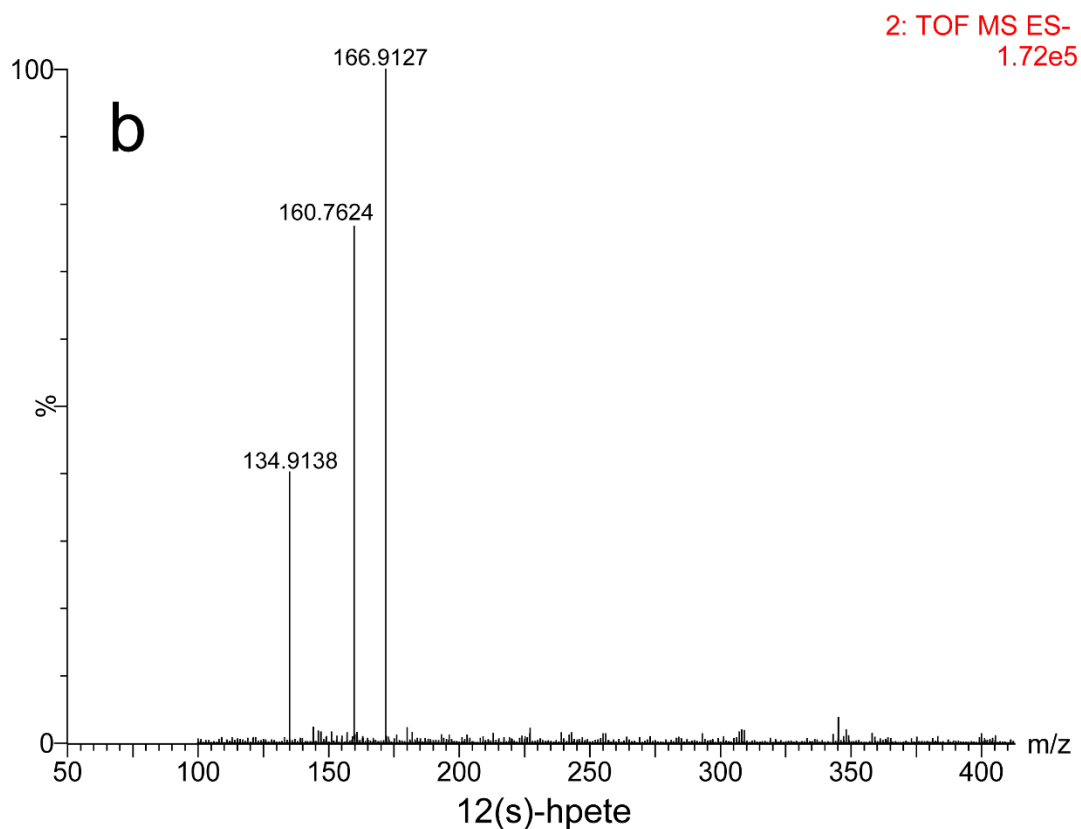

Figure S48: (a) MS/MS spectra of the identified potential marker 12(s)-hpete in urine samples. (b) The reference standard chemical spectra of 12(s)-hpete in experimental condition.

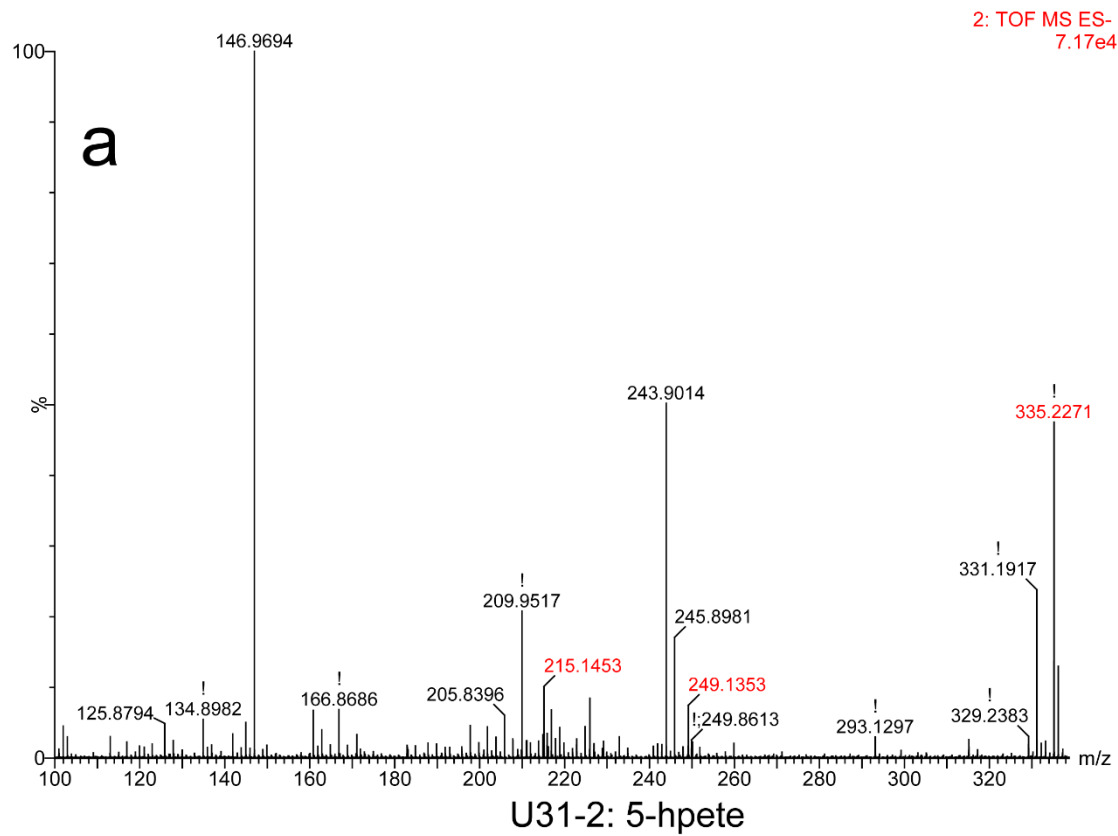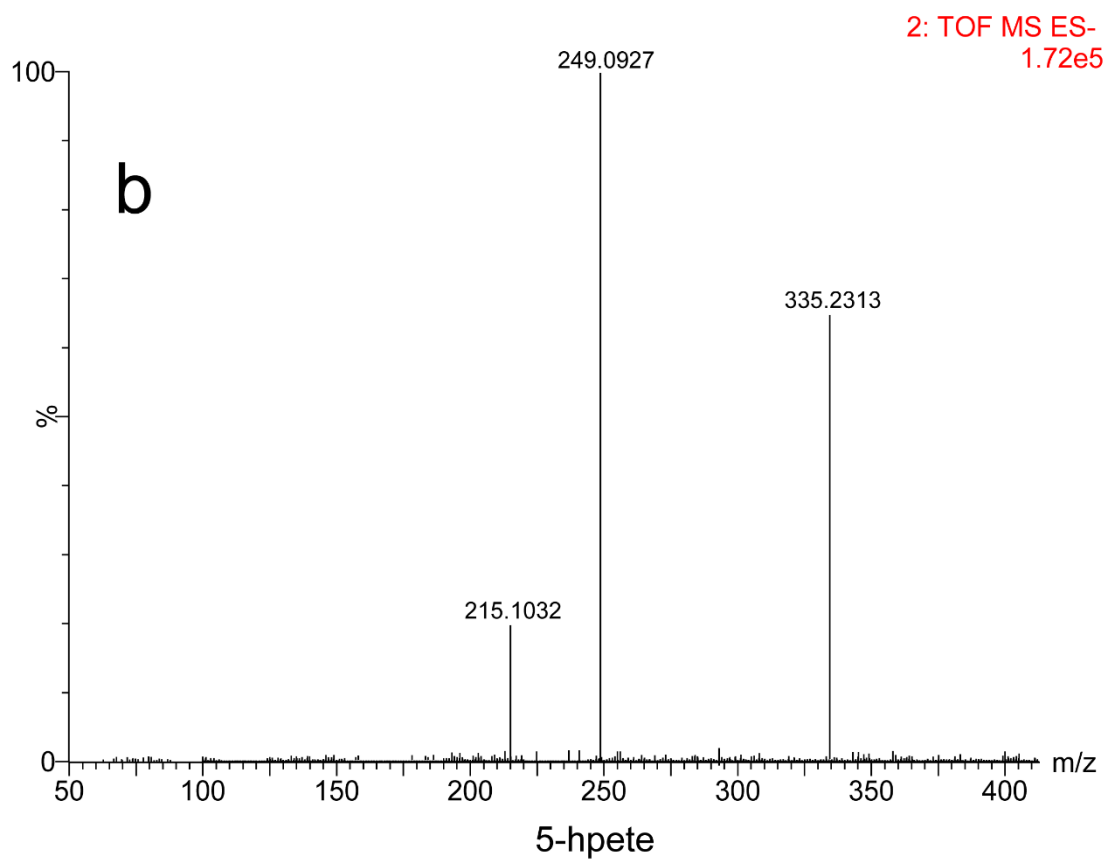

Figure S49: (a) MS/MS spectra of the identified potential marker 5-hpete in urine samples. (b) The reference standard chemical spectra of 5-hpete in experimental condition.

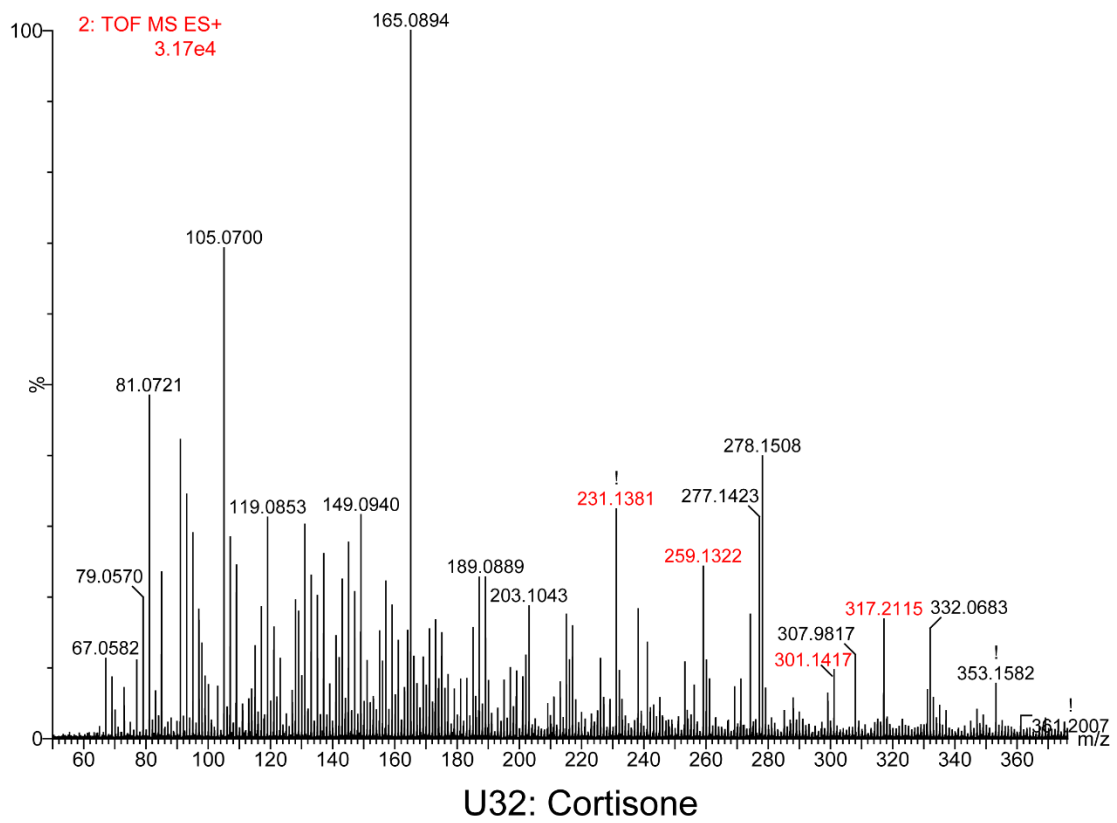

Figure S50: MS/MS spectra of the identified potential marker Cortisone in urine samples.

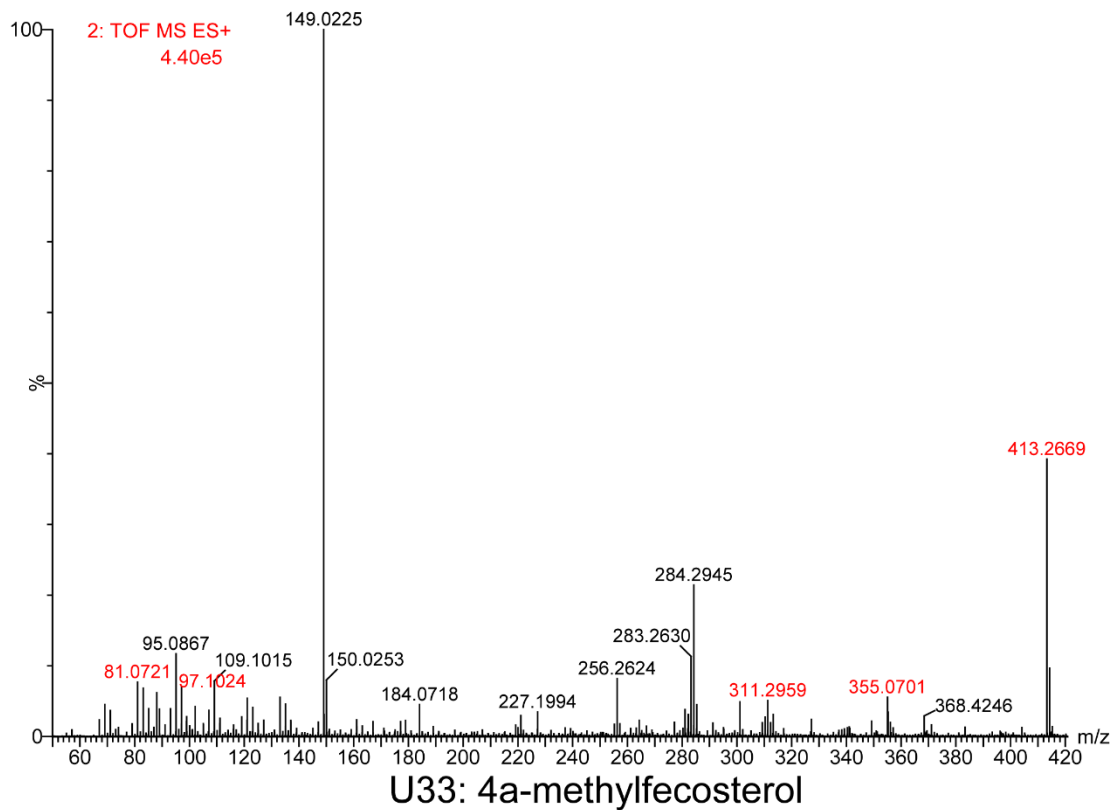

Figure S51: MS/MS spectra of the identified potential marker 4a-methylfecosterol in urine samples.

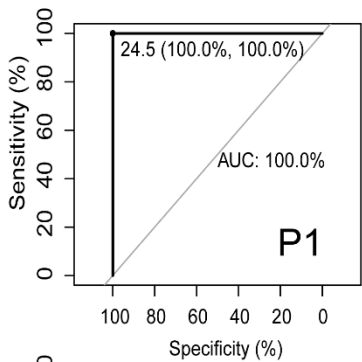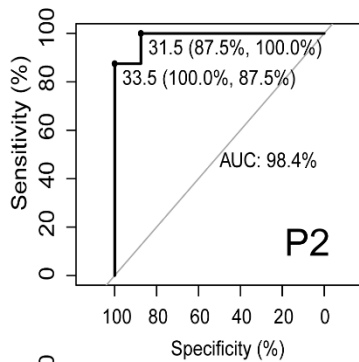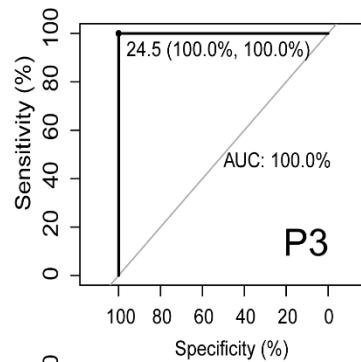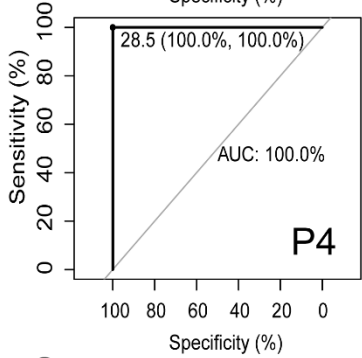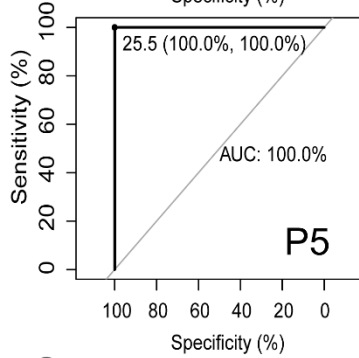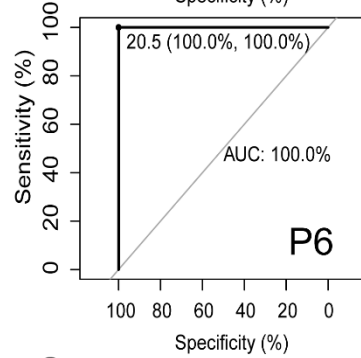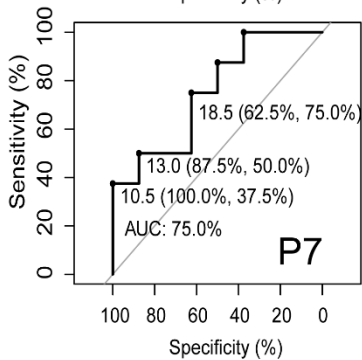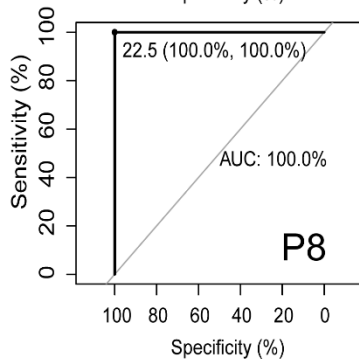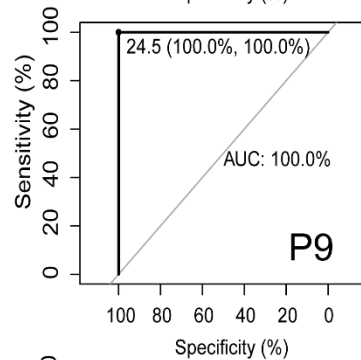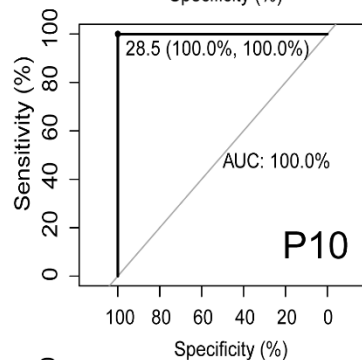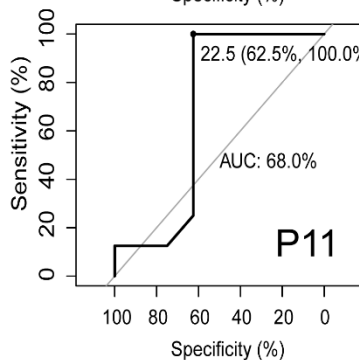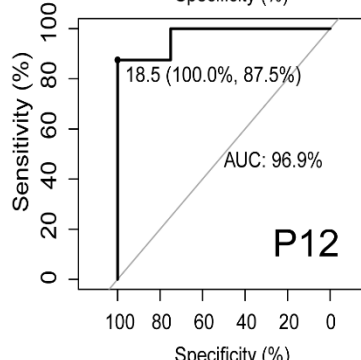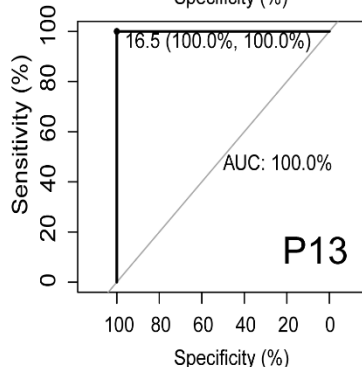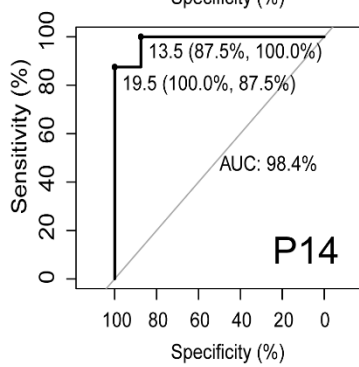

Figure S52: Evaluation on the accuracy of all differential metabolites to be biomarkers in plasma samples. All metabolites except P7, P11 have the potential to be biomarkers with high diagnostic accuracy. AUC, Area Under Curve.

**a**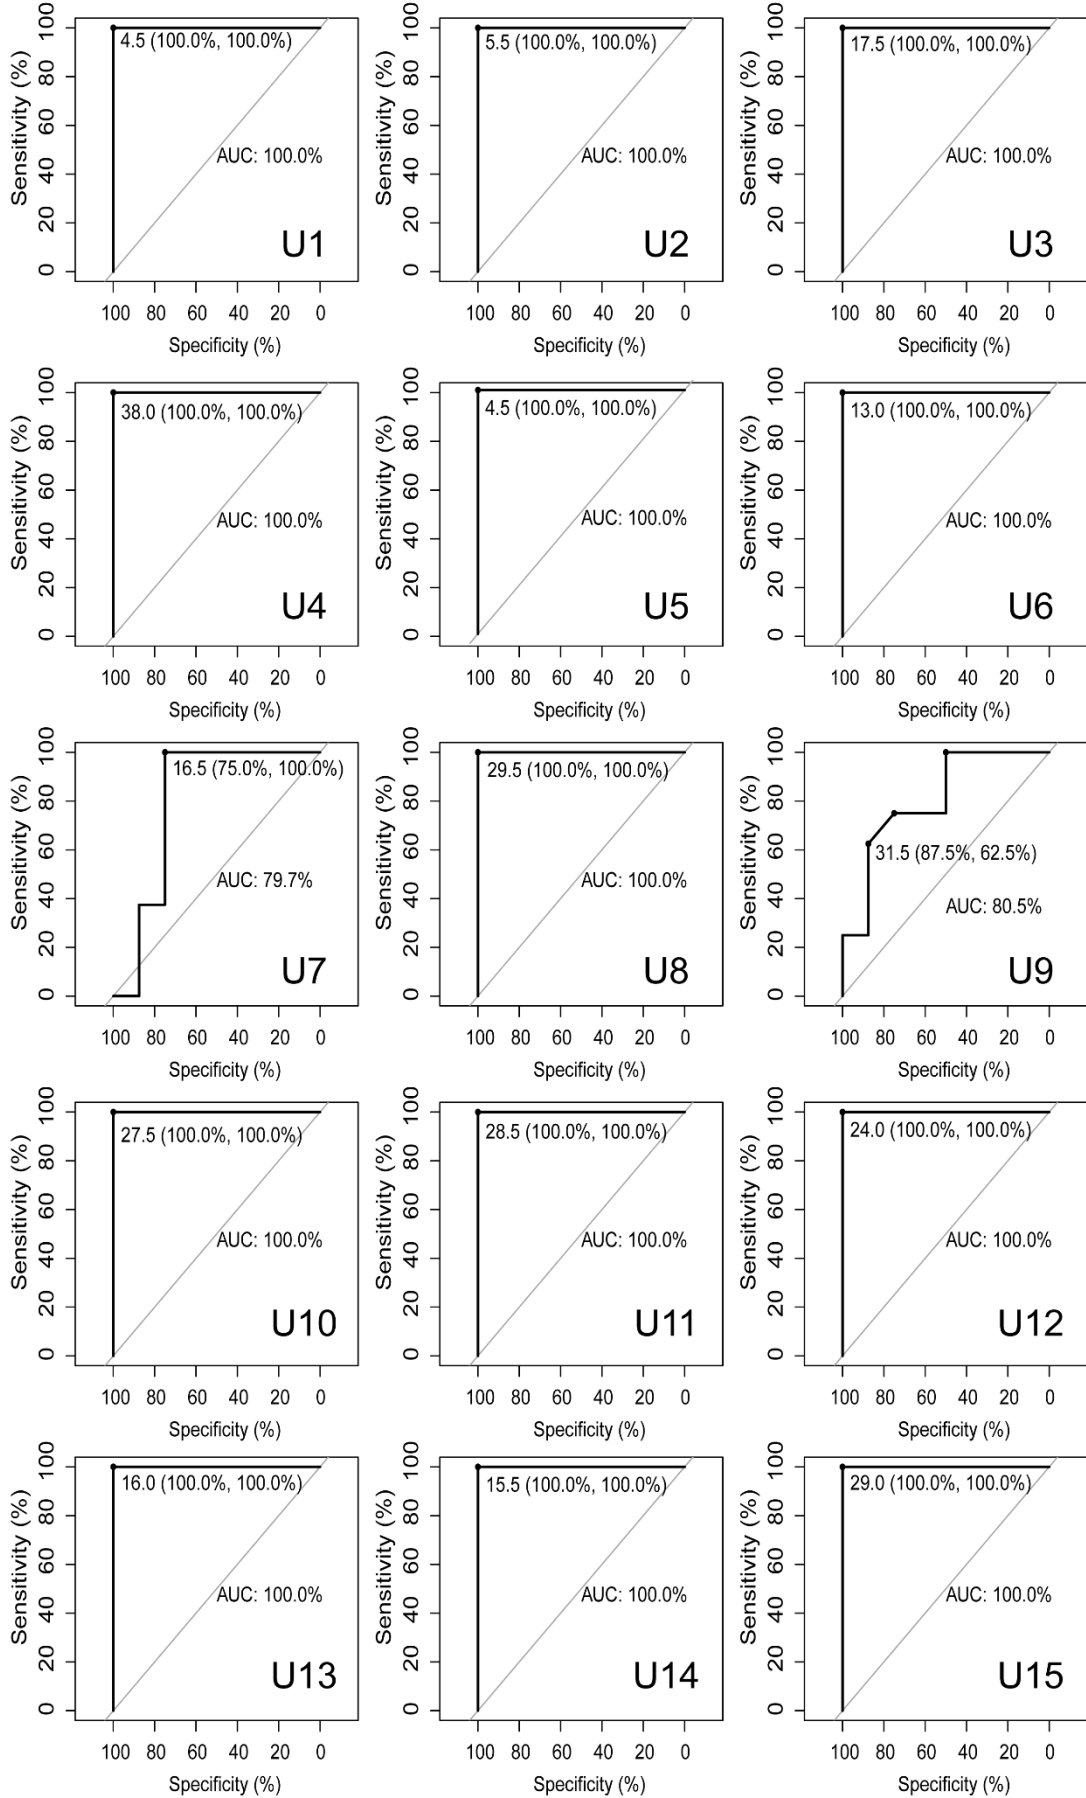

**b**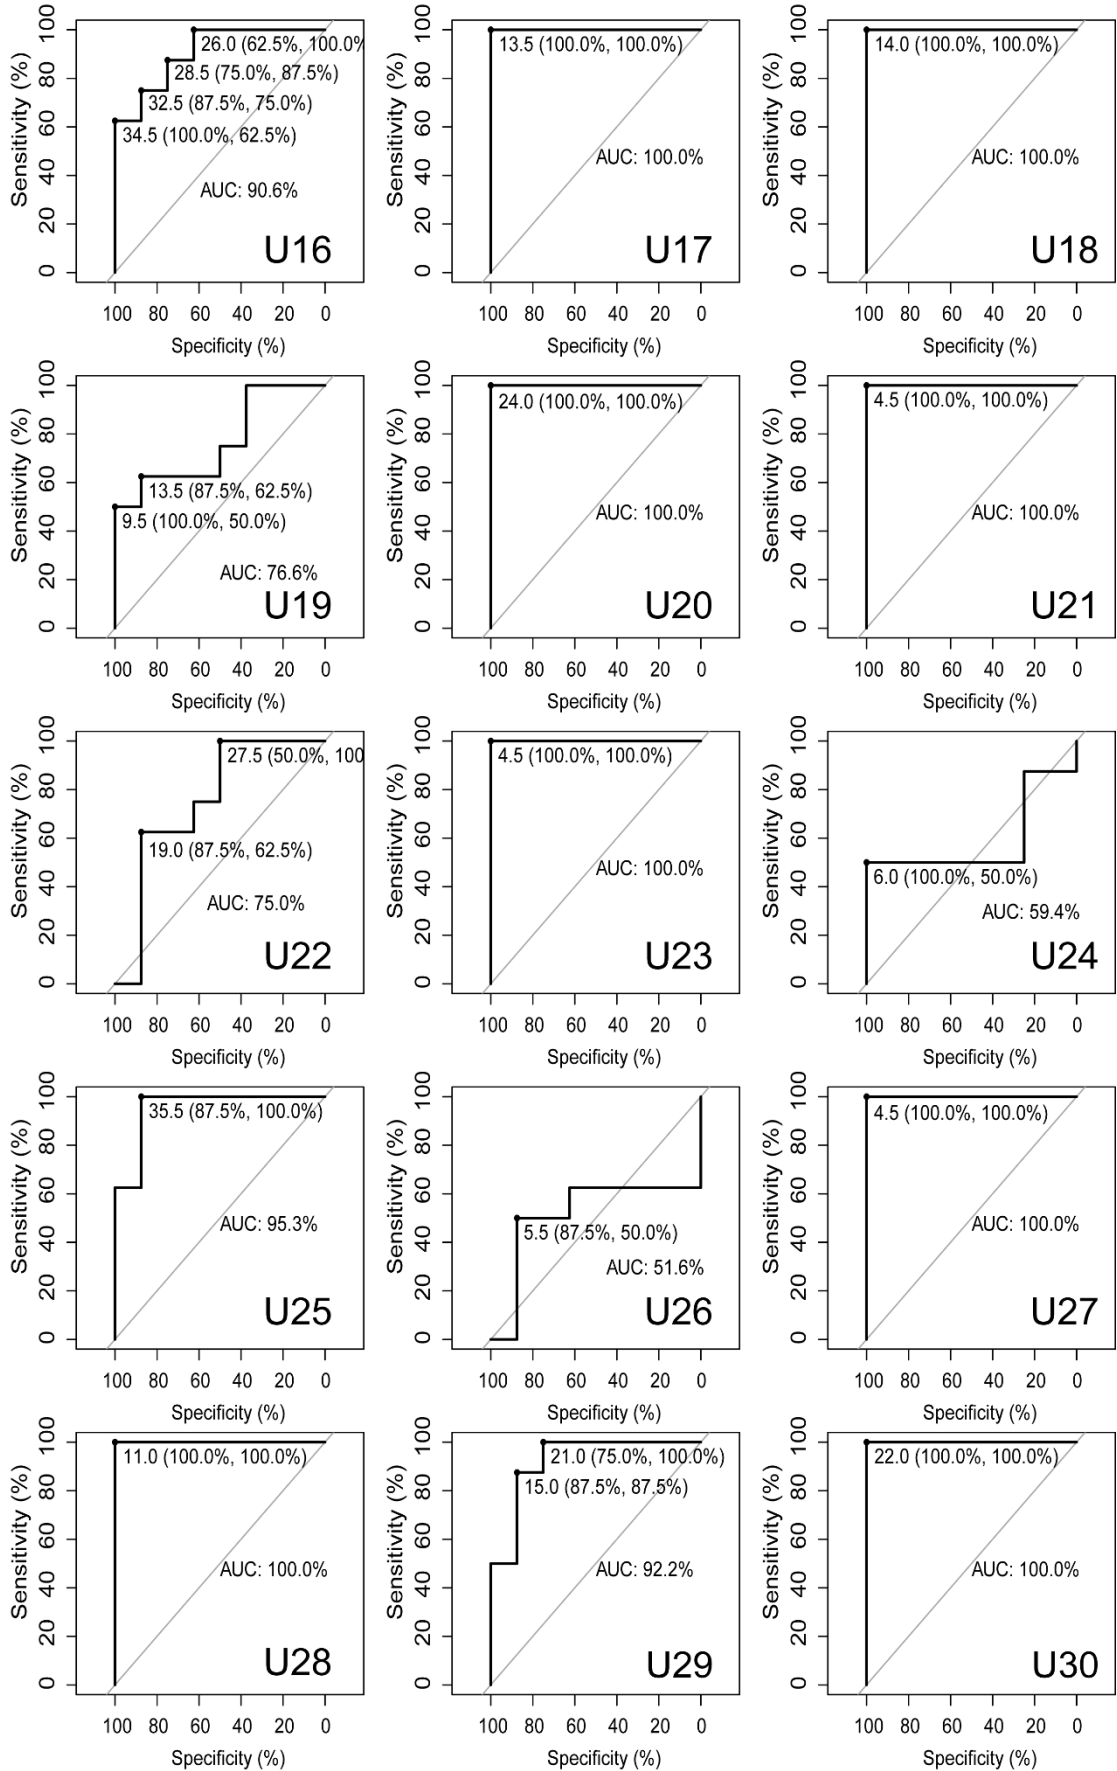

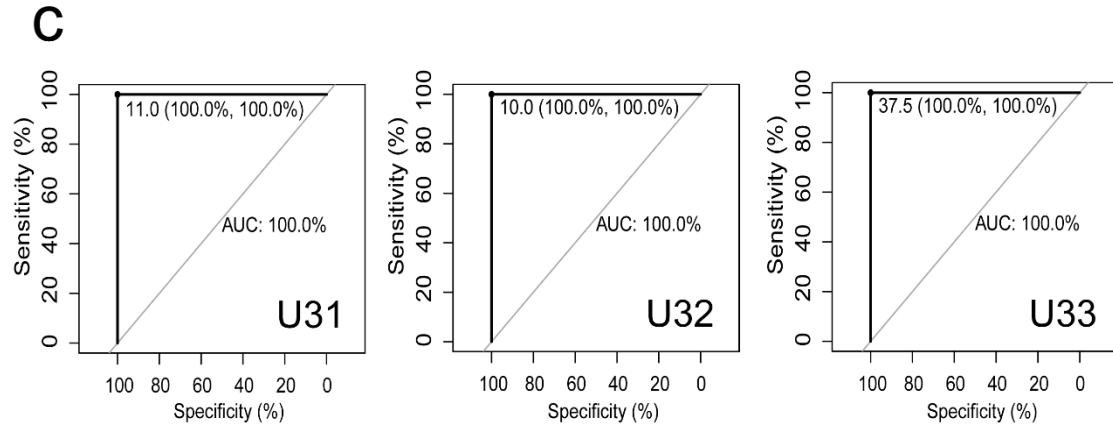

Figure S53: Evaluation on the accuracy of all differential metabolites to be biomarkers in urine samples. (a) 1-13 potential biomarkers in urine samples were evaluated with receiver operating characteristic curve (ROC). (b) 14-30 potential biomarkers in urine samples were evaluated with receiver operating characteristic curve (ROC). (c) 31-33 potential biomarkers in urine samples were evaluated with receiver operating characteristic curve (ROC). All metabolites except U7, U9, U19, U22, U24, U26, U29 have the potential to be biomarkers with high diagnostic accuracy. AUC, Area Under Curve.
